# Supplementary material for: Resorculins: hybrid polyketide macrolides from Streptomyces sp. MST-91080
Source: Royal Society of Chemistry journal article supplement (doi:10.1039/d2ob02332f), 2023-01-01
Supplement: d2ob02332f1.pdf [file d2ob02332f1.pdf]

## SUPPORTING INFORMATION

### **Resorculins: hybrid polyketide macrolides from *Streptomyces* sp. MST-91080**

Heather J. Lacey<sup>1,2</sup>, Rachel Chen<sup>1</sup>, Daniel Vuong<sup>1</sup>, Ernest Lacey<sup>1,3</sup>,  
Peter Rutledge<sup>2</sup>, Yit-Heng Chooi<sup>4</sup> and Andrew M. Piggott<sup>3</sup>, Thomas J. Booth<sup>4</sup>

<sup>1</sup> *Microbial Screening Technologies, Smithfield, NSW 2164, Australia*

<sup>2</sup> *School of Chemistry, The University of Sydney, NSW 2006, Australia*

<sup>3</sup> *School of Natural Sciences, Macquarie University, NSW 2109, Australia*

<sup>4</sup> *School of Molecular Sciences, The University of Western Australia, Perth, WA 6009, Australia*

## Table of Contents

|                                                                                                                          |    |
|--------------------------------------------------------------------------------------------------------------------------|----|
| <b>Supplementary Figures</b> .....                                                                                       | 2  |
| Figure S1. Fractionation and isolation schematic for MST-91080. ....                                                     | 2  |
| Figure S2. HRESI spectra for resorculin A and resorculin B. ....                                                         | 3  |
| Figure S3: UV-vis spectra of resorculin A (1) and resoculin B (2). ....                                                  | 5  |
| Figure S4. $^1\text{H}$ NMR spectrum (600 MHz, $\text{DMSO-}d_6$ ) of resorculin A (1). ....                             | 6  |
| Figure S5. $^{13}\text{C}$ NMR spectrum (150 MHz, $\text{DMSO-}d_6$ ) of resorculin A (1). ....                          | 7  |
| Figure S6. $^1\text{H} - ^{13}\text{C}$ HSQC NMR spectrum (600 MHz, $\text{DMSO-}d_6$ ) of resorculin A (1). ....        | 8  |
| Figure S7. $^1\text{H} - ^1\text{H}$ COSY NMR spectrum (600 MHz, $\text{DMSO-}d_6$ ) of resorculin A (1). ....           | 9  |
| Figure S8. $^1\text{H} - ^{13}\text{C}$ HMBC NMR spectrum (600 MHz, $\text{DMSO-}d_6$ ) of resorculin A (1). ....        | 10 |
| Figure S9. $^1\text{H} - ^1\text{H}$ ROESY NMR spectrum (600 MHz, $\text{DMSO-}d_6$ ) of resorculin A (1). ....          | 11 |
| Figure S10. $^1\text{H}$ NMR spectrum (600 MHz, $\text{DMSO-}d_6$ ) of resorculin B (2). ....                            | 12 |
| Figure S11. $^{13}\text{C}$ NMR spectrum (150 MHz, $\text{DMSO-}d_6$ ) of resorculin B (2). ....                         | 13 |
| Figure S12. $^1\text{H} - ^{13}\text{C}$ HSQC NMR spectrum (600 MHz, $\text{DMSO-}d_6$ ) of resorculin B (2). ....       | 14 |
| Figure S13. $^1\text{H} - ^1\text{H}$ COSY NMR spectrum (600 MHz, $\text{DMSO-}d_6$ ) of resorculin B (2). ....          | 15 |
| Figure S14. $^1\text{H} - ^{13}\text{C}$ HMBC NMR spectrum (600 MHz, $\text{DMSO-}d_6$ ) of resorculin B (2). ....       | 16 |
| Figure S15. $^1\text{H} - ^1\text{H}$ ROESY NMR spectrum (600 MHz, $\text{DMSO-}d_6$ ) of resorculin B (2). ....         | 17 |
| Figure S16. IR Spectrum of resorculin A (1). ....                                                                        | 18 |
| Figure S17. IR Spectrum of resorculin B (2). ....                                                                        | 19 |
| <b>Supplementary Tables</b> .....                                                                                        | 20 |
| Table S1. $^1\text{H}$ (600 MHz) and $^{13}\text{C}$ (150 MHz) NMR data for resorculin A (1) in $\text{DMSO-}d_6$ . .... | 20 |
| Table S2. $^1\text{H}$ (600 MHz) and $^{13}\text{C}$ (150 MHz) NMR data for resorculin B (2) in $\text{DMSO-}d_6$ . .... | 21 |
| Table S3. BLASTP hits for the resorculin ( <i>rsn</i> ) biosynthetic gene cluster. ....                                  | 22 |
| Table S4. Modules encoded by the resorculin ( <i>rsn</i> ) BGC. ....                                                     | 23 |
| Table S5. cblaster analysis of the resorculin ( <i>rsn</i> ) biosynthetic gene cluster. ....                             | 24 |
| <b>References</b> .....                                                                                                  | 25 |

## Supplementary Figures

**Figure S1.** Fractionation and isolation schematic for MST-91080.

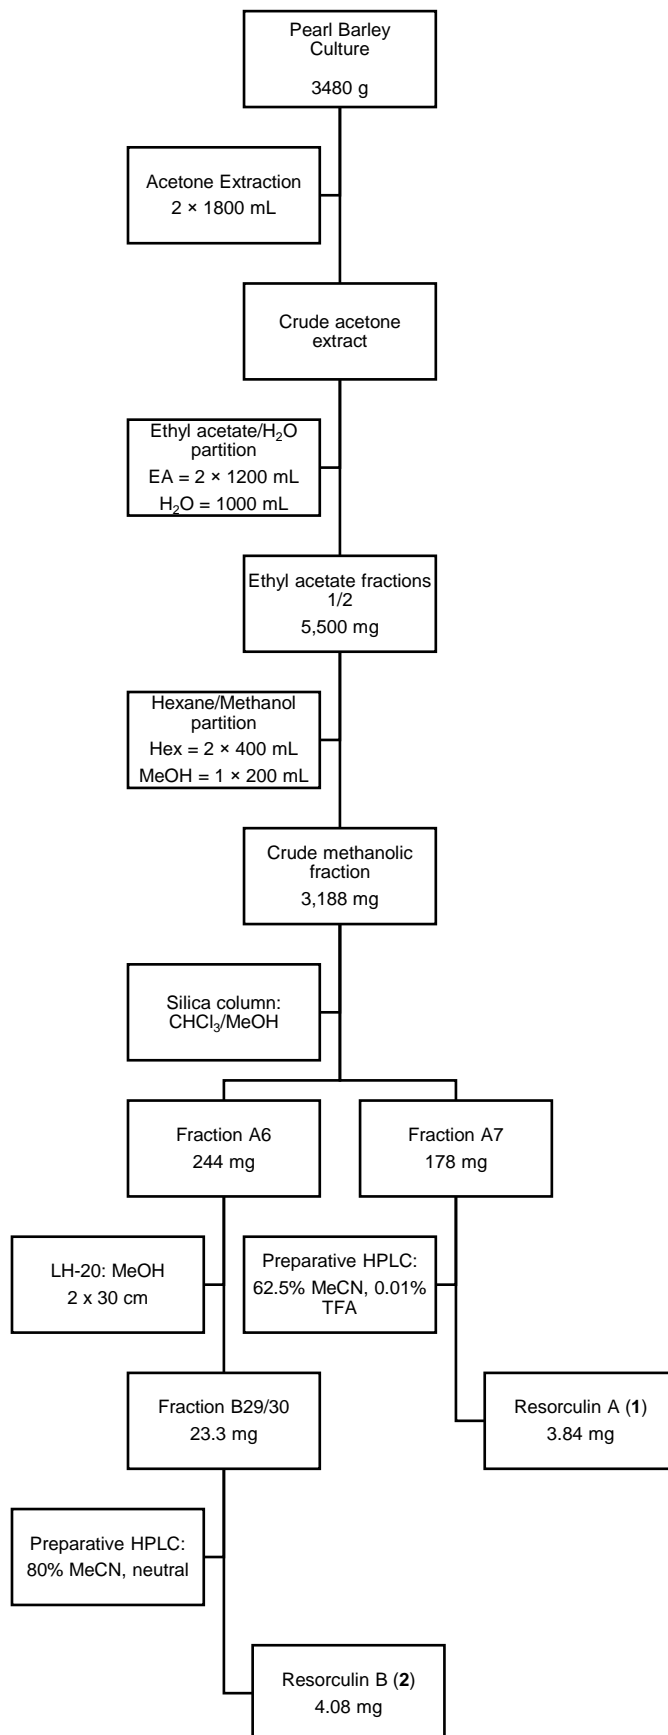

**Figure S2.** HRESI spectra for resorculin A and resorculin B.

a) HRESI(-)MS spectrum of resorculin A (**1**).

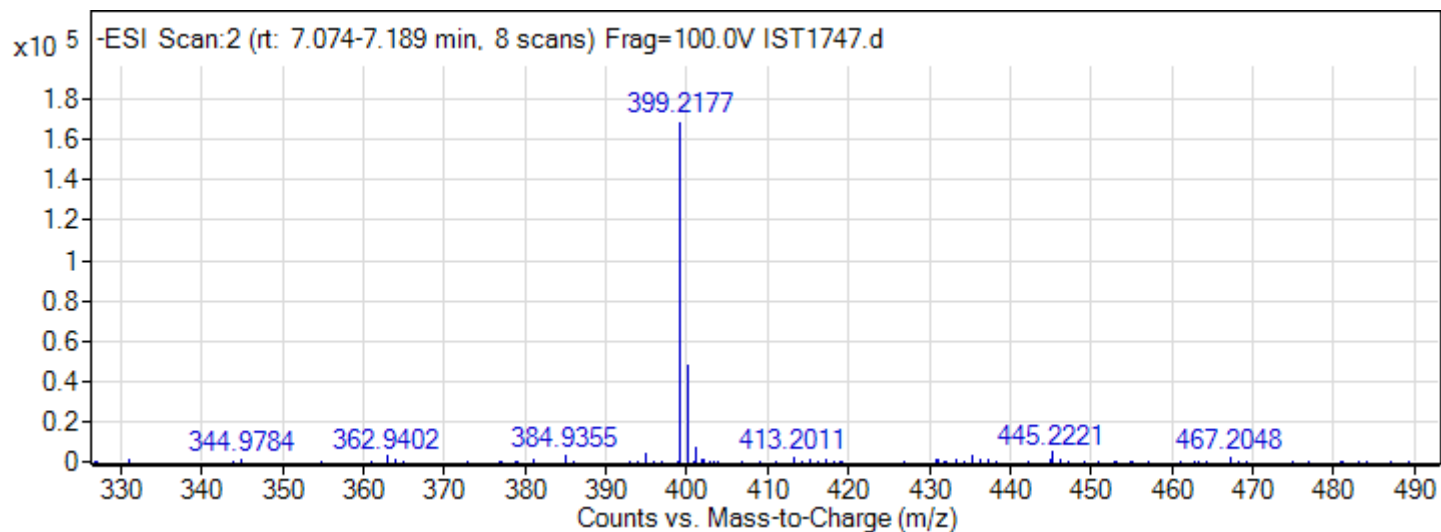

b) Elemental composition report for peak 399.2177.

| Formula                                                                       | Species            | m/z      | Score | Diff (ppm) | Diff (mDa) |
|-------------------------------------------------------------------------------|--------------------|----------|-------|------------|------------|
| C <sub>24</sub> H <sub>32</sub> O <sub>5</sub>                                | (M-H) <sup>-</sup> | 399.2177 | 99.39 | 0.01       | 0          |
| C <sub>23</sub> H <sub>26</sub> N <sub>7</sub>                                | (M-H) <sup>-</sup> | 399.2177 | 99.46 | -0.38      | -0.15      |
| C <sub>17</sub> H <sub>32</sub> N <sub>6</sub> O <sub>3</sub> S               | (M-H) <sup>-</sup> | 399.2177 | 86    | 0.63       | 0.25       |
| C <sub>25</sub> H <sub>36</sub> S <sub>2</sub>                                | (M-H) <sup>-</sup> | 399.2177 | 82.8  | 1.35       | 0.54       |
| C <sub>10</sub> H <sub>32</sub> N <sub>12</sub> O <sub>2</sub> S <sub>2</sub> | (M-H) <sup>-</sup> | 399.2177 | 68.48 | 1.46       | 0.59       |
| C <sub>16</sub> H <sub>36</sub> N <sub>2</sub> O <sub>7</sub> S               | (M-H) <sup>-</sup> | 399.2177 | 79.28 | -2.45      | -0.98      |
| C <sub>15</sub> H <sub>30</sub> N <sub>9</sub> O <sub>2</sub> S               | (M-H) <sup>-</sup> | 399.2177 | 79.84 | -2.98      | -1.19      |
| C <sub>25</sub> H <sub>28</sub> N <sub>4</sub> O                              | (M-H) <sup>-</sup> | 399.2177 | 95.73 | 3.16       | 1.26       |
| C <sub>22</sub> H <sub>30</sub> N <sub>3</sub> O <sub>4</sub>                 | (M-H) <sup>-</sup> | 399.2177 | 93.53 | -3.53      | -1.41      |
| C <sub>11</sub> H <sub>30</sub> N <sub>9</sub> O <sub>7</sub>                 | (M-H) <sup>-</sup> | 399.2177 | 73.51 | 3.74       | 1.5        |

c) HRESI(+)-MS spectrum of resorculin B (2).

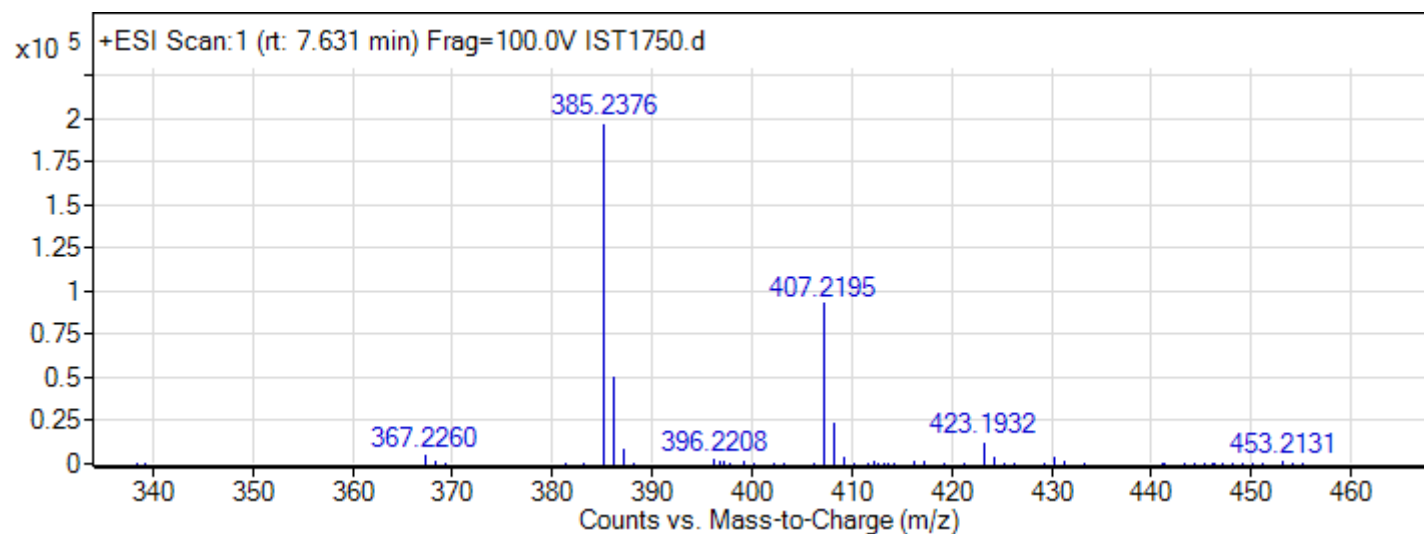

d) Elemental composition report for peak 385.2376.

| Formula                                                         | Species            | m/z      | Score | Diff (ppm) | Diff (mDa) |
|-----------------------------------------------------------------|--------------------|----------|-------|------------|------------|
| C <sub>24</sub> H <sub>32</sub> O <sub>4</sub>                  | (M+H) <sup>+</sup> | 385.2376 | 99.51 | -0.48      | -0.18      |
| C <sub>25</sub> H <sub>28</sub> N <sub>4</sub>                  | (M+H) <sup>+</sup> | 385.2376 | 95.04 | 2.81       | 1.08       |
| C <sub>22</sub> H <sub>30</sub> N <sub>3</sub> O <sub>3</sub>   | (M+H) <sup>+</sup> | 385.2376 | 93.28 | -4.16      | -1.6       |
| C <sub>17</sub> H <sub>32</sub> N <sub>6</sub> O <sub>2</sub> S | (M+H) <sup>+</sup> | 385.2376 | 90.38 | 0.21       | 0.08       |
| C <sub>19</sub> H <sub>34</sub> N <sub>3</sub> O <sub>3</sub> S | (M+H) <sup>+</sup> | 385.2376 | 85.88 | 3.94       | 1.51       |
| C <sub>15</sub> H <sub>30</sub> N <sub>9</sub> O S              | (M+H) <sup>+</sup> | 385.2376 | 83.45 | -3.54      | -1.36      |
| C <sub>27</sub> H <sub>30</sub> N O                             | (M+H) <sup>+</sup> | 385.2376 | 82.58 | 6.47       | 2.49       |
| C <sub>16</sub> H <sub>36</sub> N <sub>2</sub> O <sub>6</sub> S | (M+H) <sup>+</sup> | 385.2376 | 82.43 | -3.02      | -1.16      |
| C <sub>20</sub> H <sub>28</sub> N <sub>6</sub> O <sub>2</sub>   | (M+H) <sup>+</sup> | 385.2376 | 79.83 | -7.85      | -3.02      |
| C <sub>11</sub> H <sub>30</sub> N <sub>9</sub> O <sub>6</sub>   | (M+H) <sup>+</sup> | 385.2376 | 79.13 | 3.45       | 1.33       |

**Figure S3:** UV-vis spectra of resorculin A (1) and resoculin B (2).

a) UV-vis spectrum of resorculin A (1) in MeCN

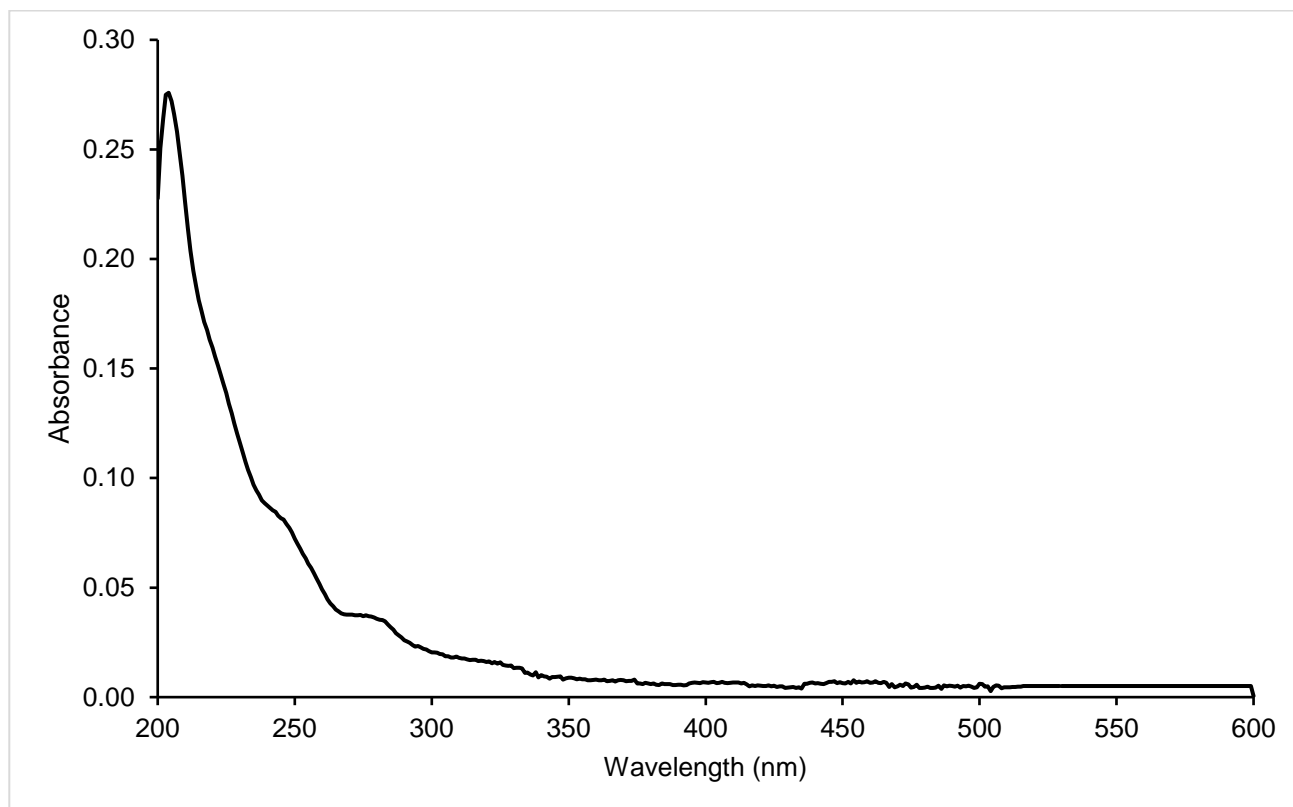

b) UV-vis spectrum of resoculin B (2) in MeCN

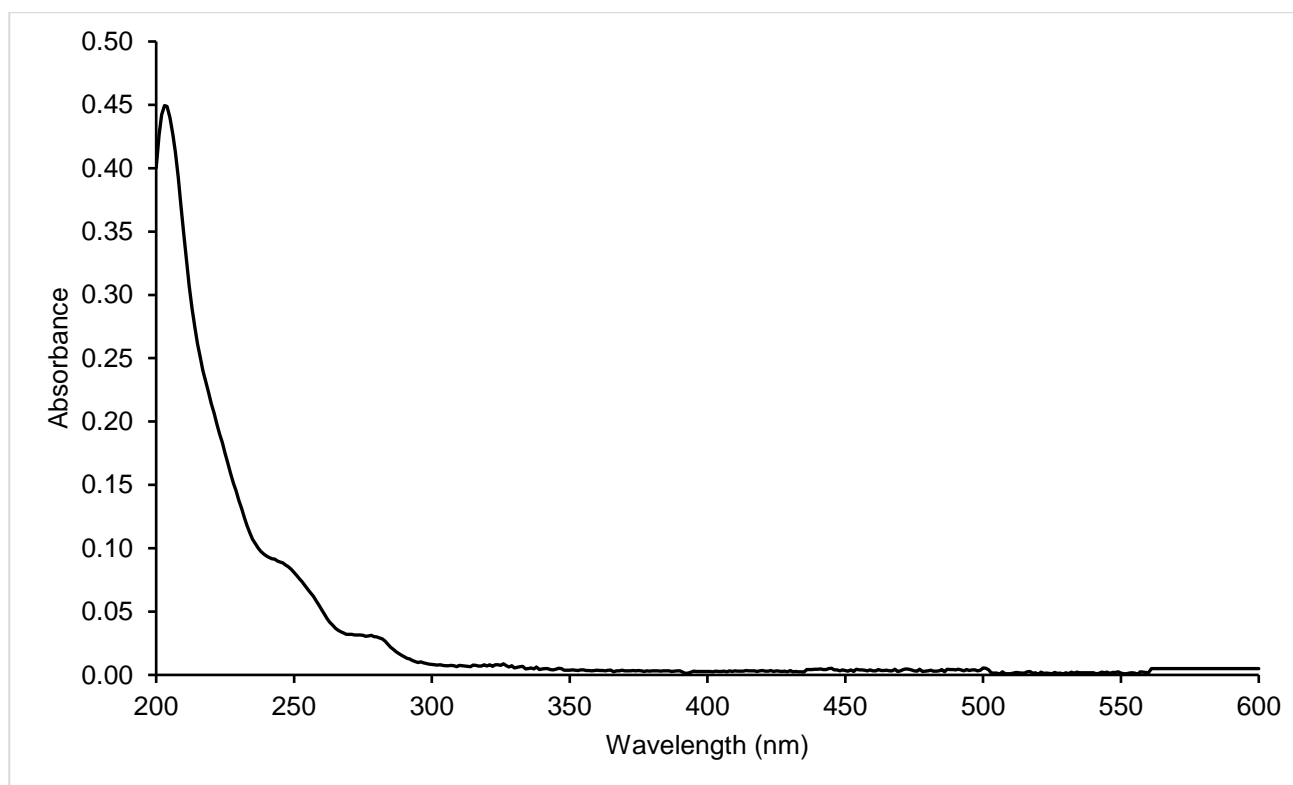

**Figure S4.**  $^1\text{H}$  NMR spectrum (600 MHz,  $\text{DMSO-}d_6$ ) of resorculin A (**1**).

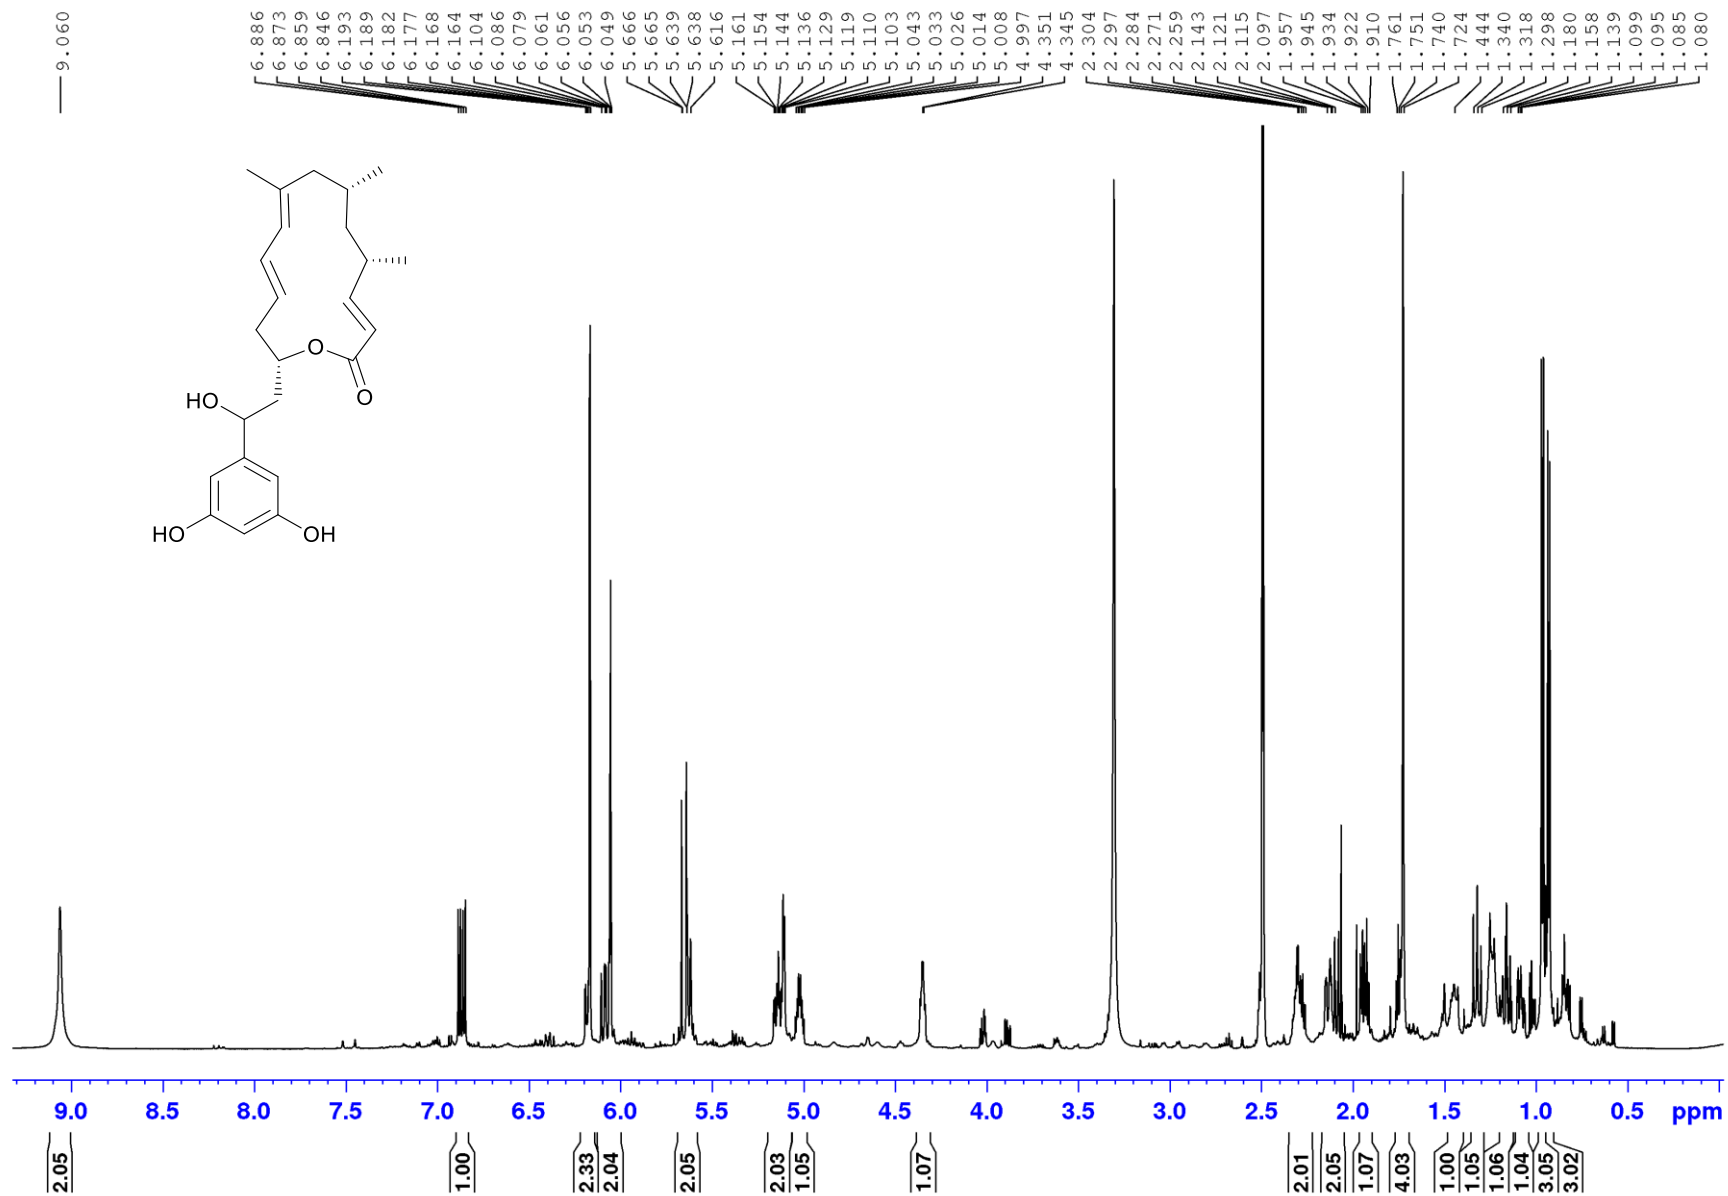

**Figure S5.**  $^{13}\text{C}$  NMR spectrum (150 MHz,  $\text{DMSO-}d_6$ ) of resorculin A (1).

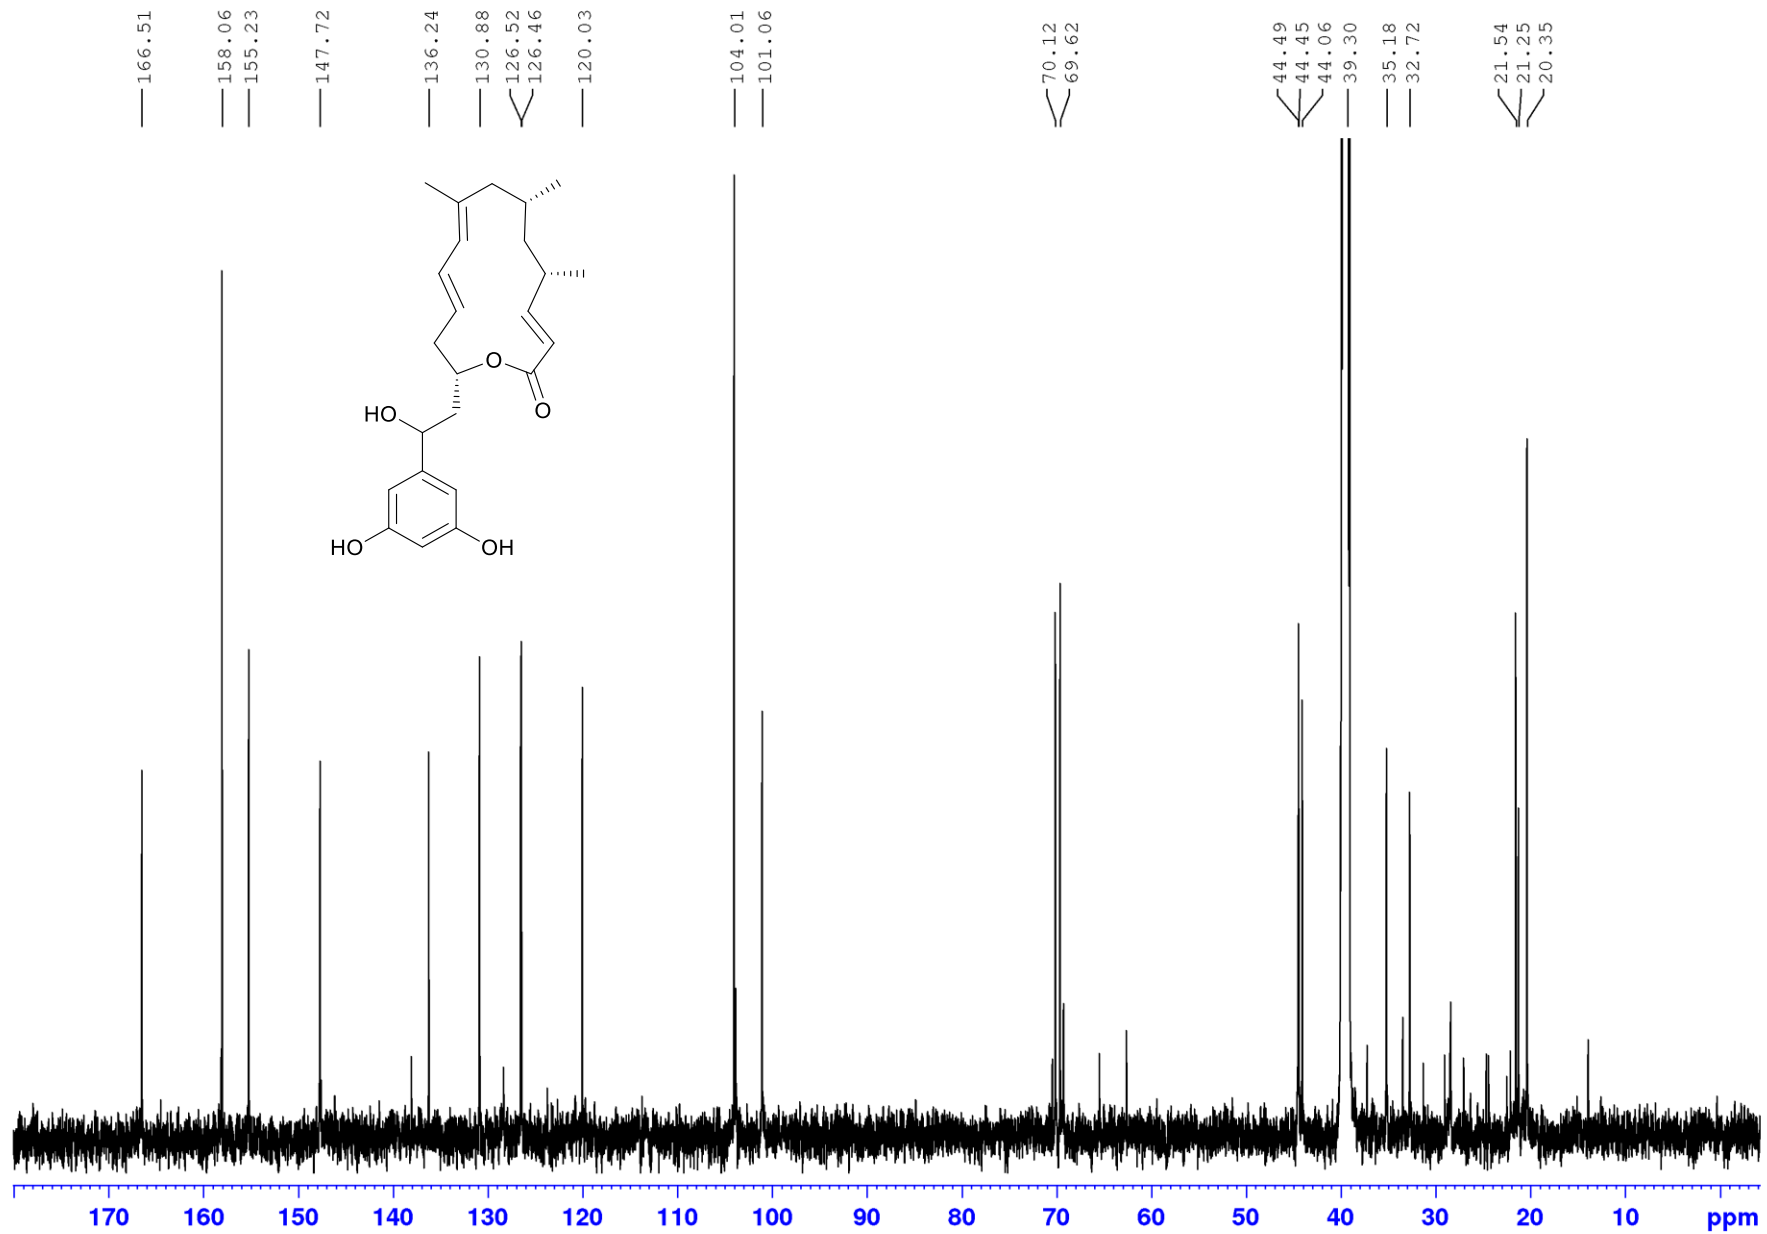



**Figure S6.**  $^1\text{H} - ^{13}\text{C}$  HSQC NMR spectrum (600 MHz,  $\text{DMSO-}d_6$ ) of resorculin A (**1**).

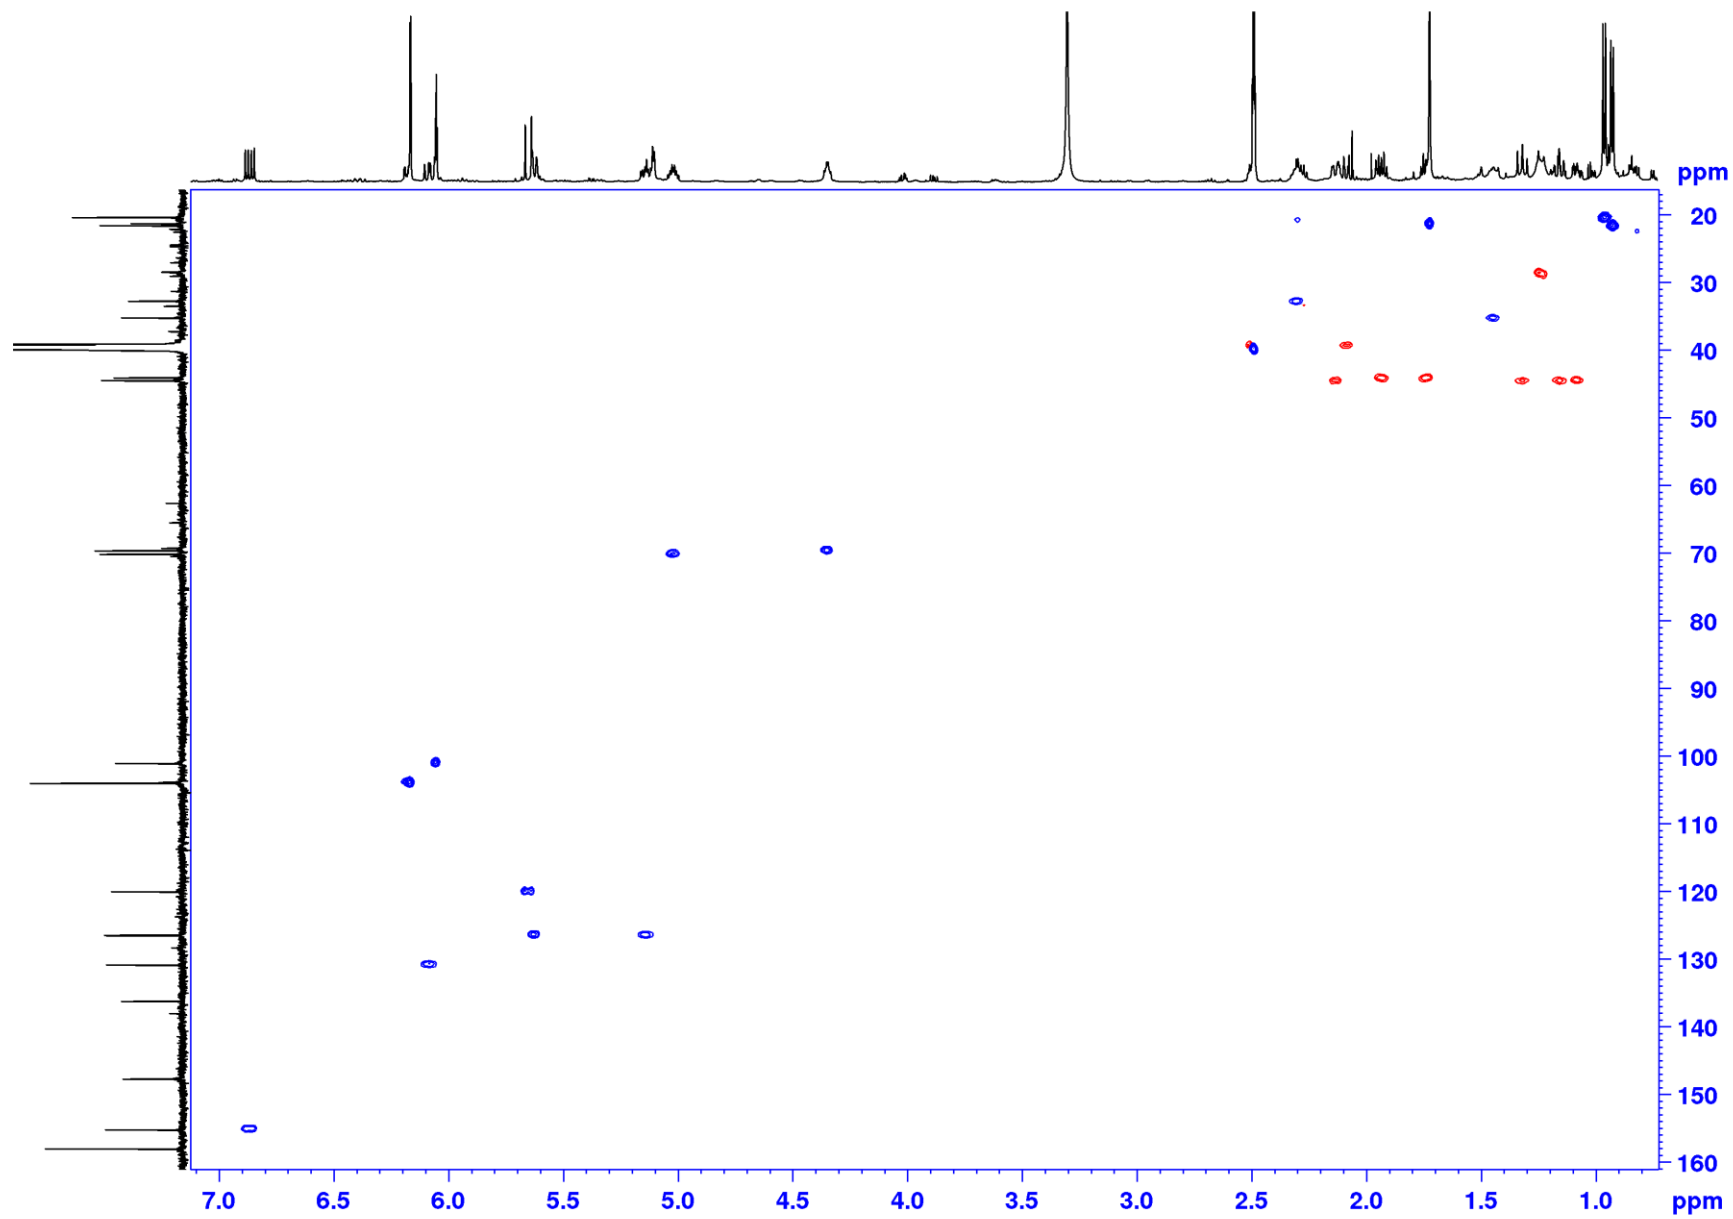

**Figure S7.**  $^1\text{H} - ^1\text{H}$  COSY NMR spectrum (600 MHz,  $\text{DMSO-}d_6$ ) of resorculin A (**1**).

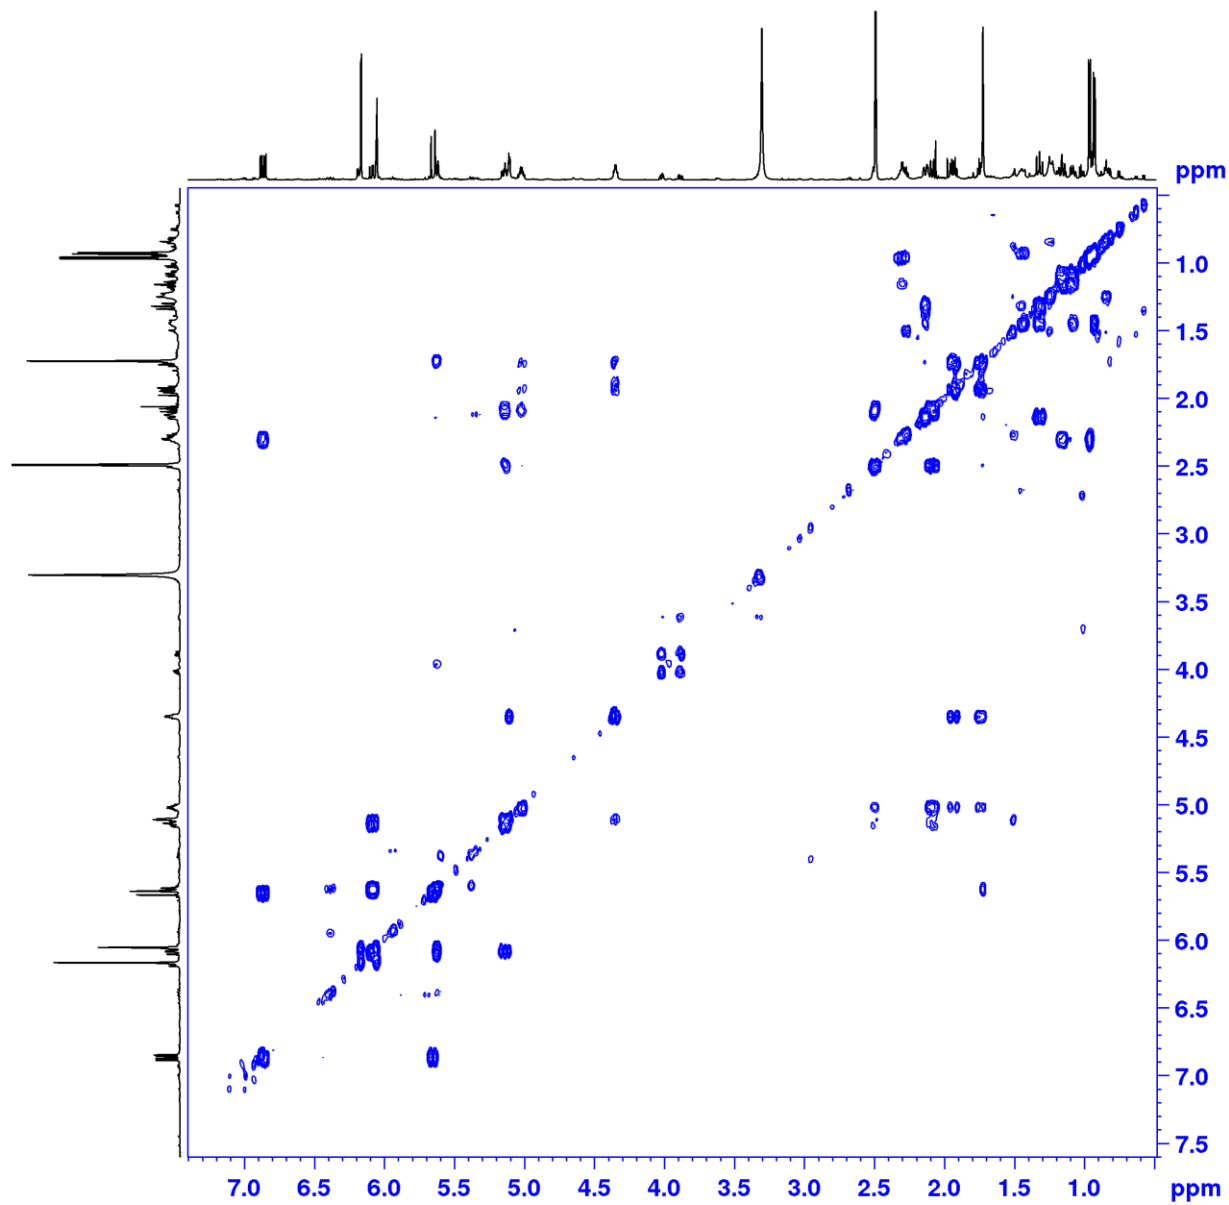

**Figure S8.**  $^1\text{H} - ^{13}\text{C}$  HMBC NMR spectrum (600 MHz,  $\text{DMSO-}d_6$ ) of resorculin A (**1**).

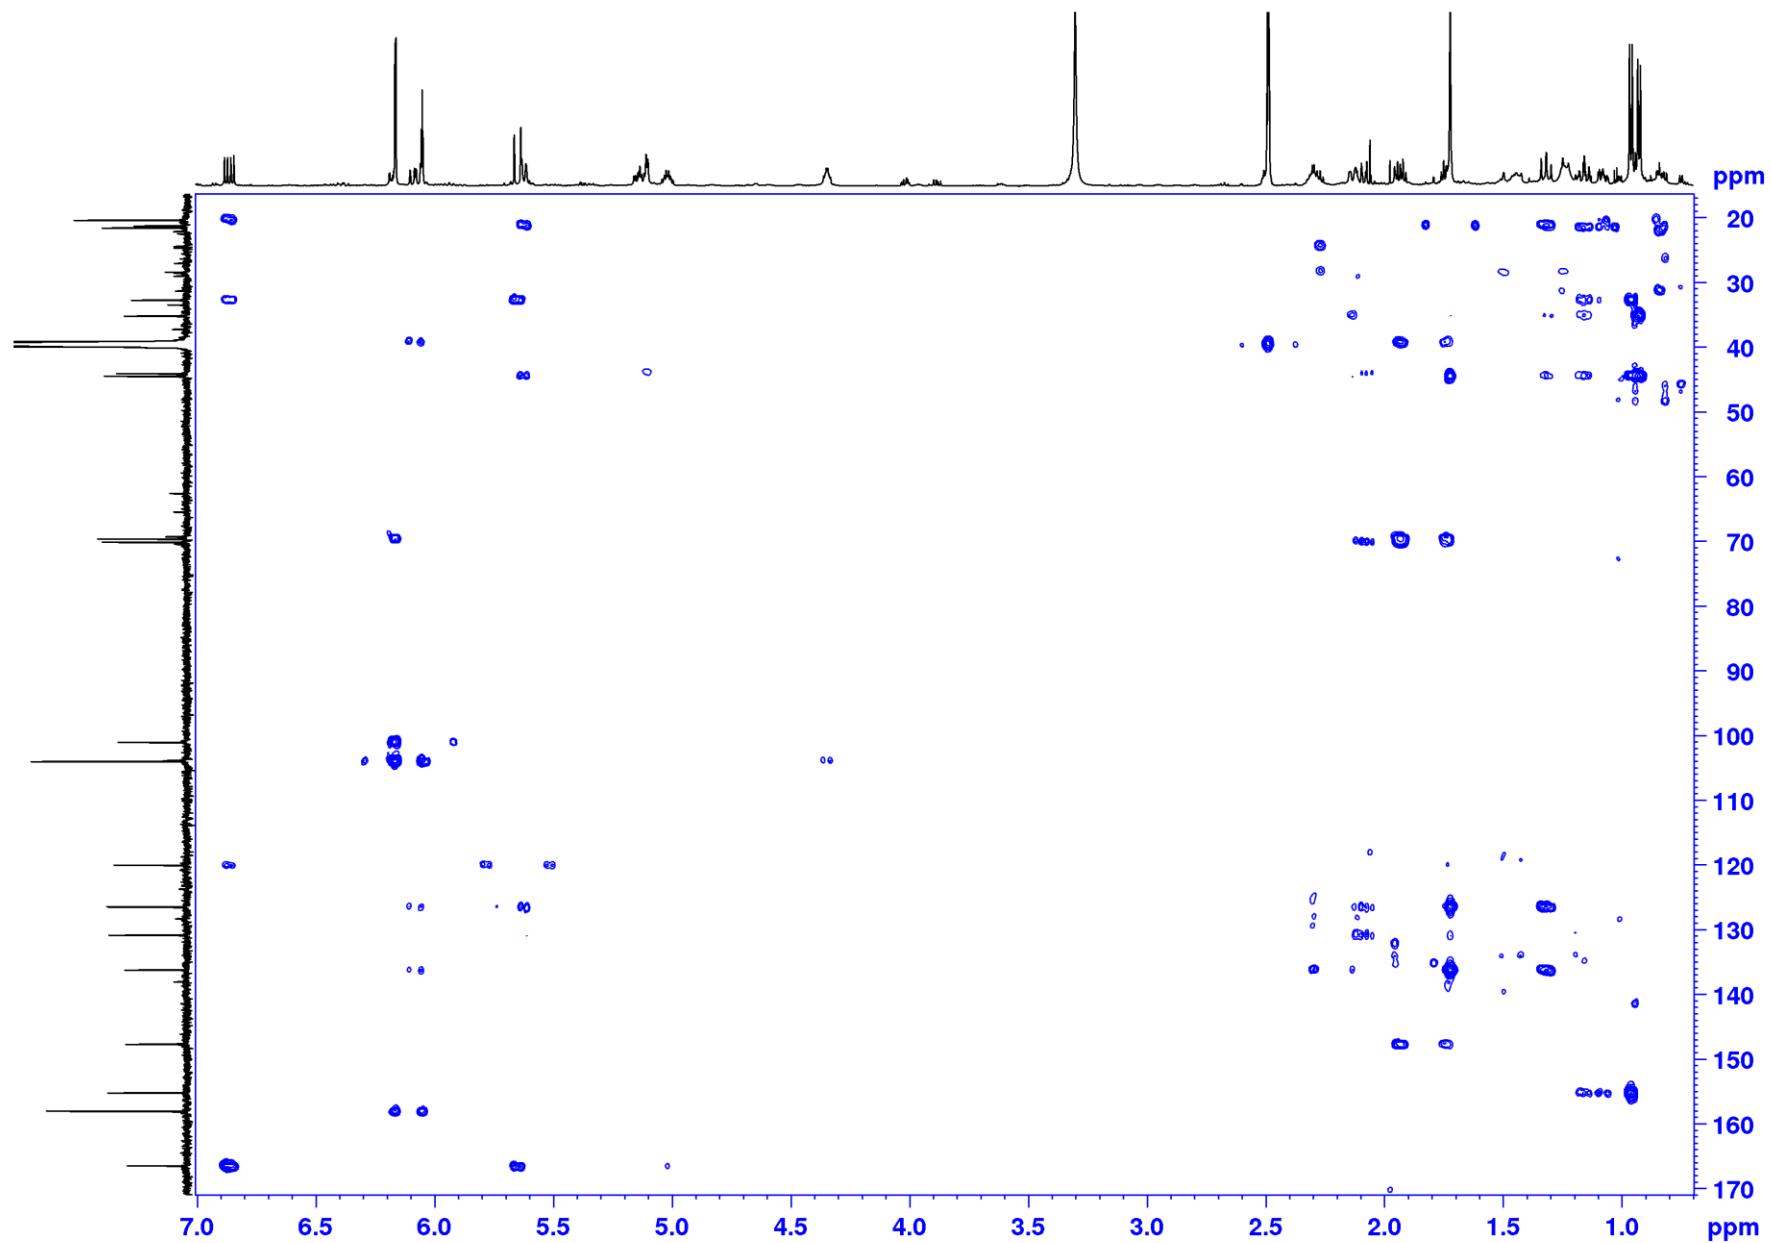

**Figure S9.**  $^1\text{H} - ^1\text{H}$  ROESY NMR spectrum (600 MHz,  $\text{DMSO-}d_6$ ) of resorculin A (**1**).

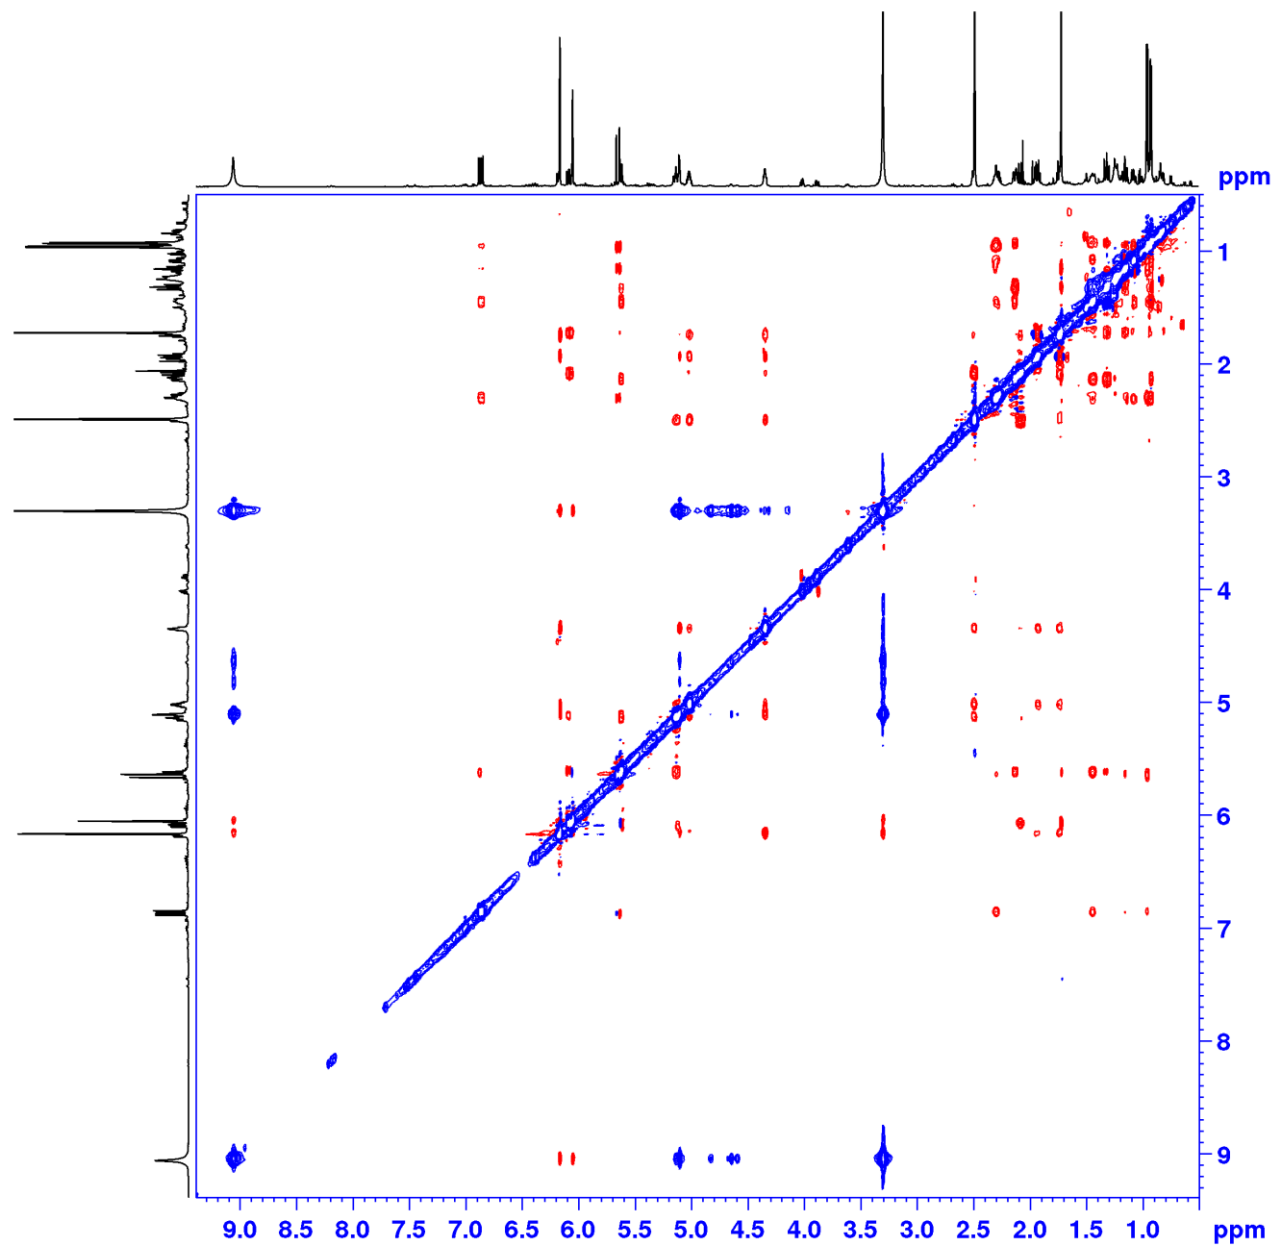

**Figure S10.**  $^1\text{H}$  NMR spectrum (600 MHz,  $\text{DMSO-}d_6$ ) of resorculin B (**2**).

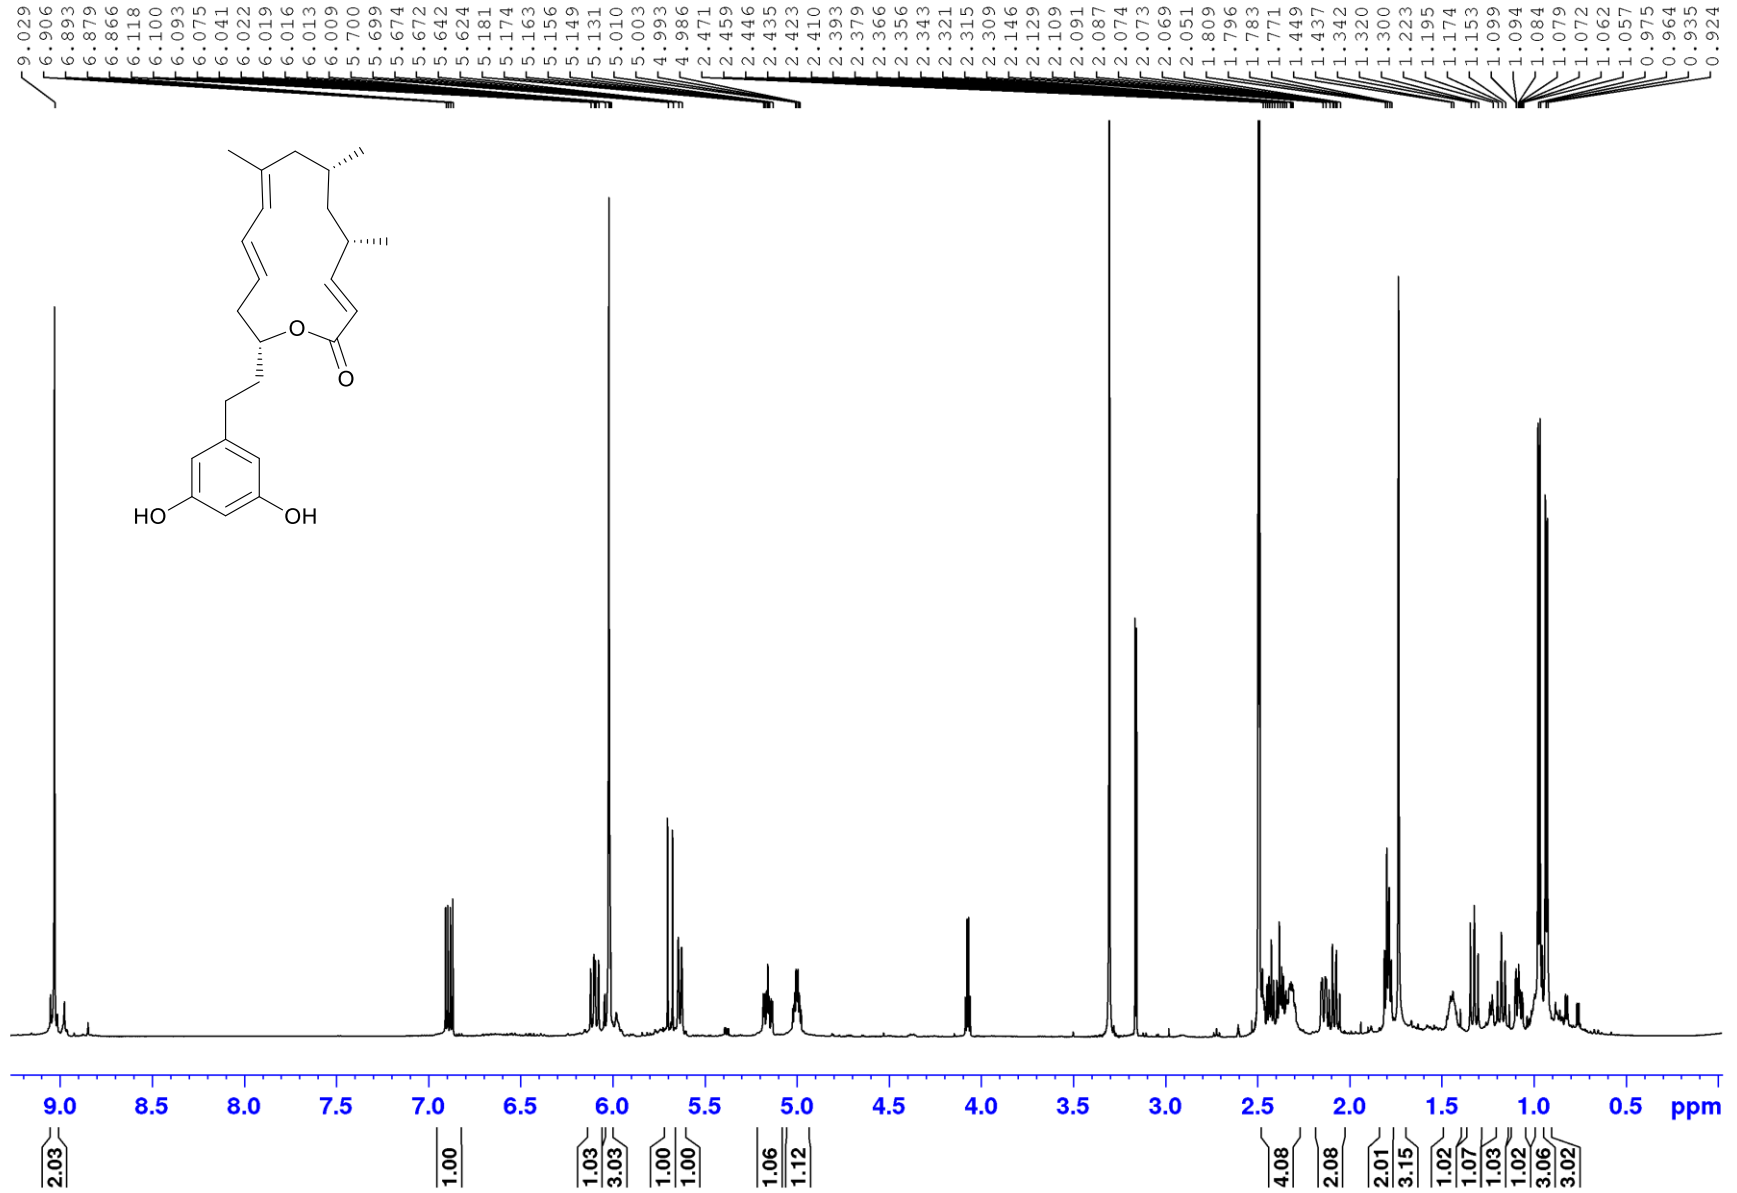

**Figure S11.**  $^{13}\text{C}$  NMR spectrum (150 MHz,  $\text{DMSO-}d_6$ ) of resorculin B (**2**).

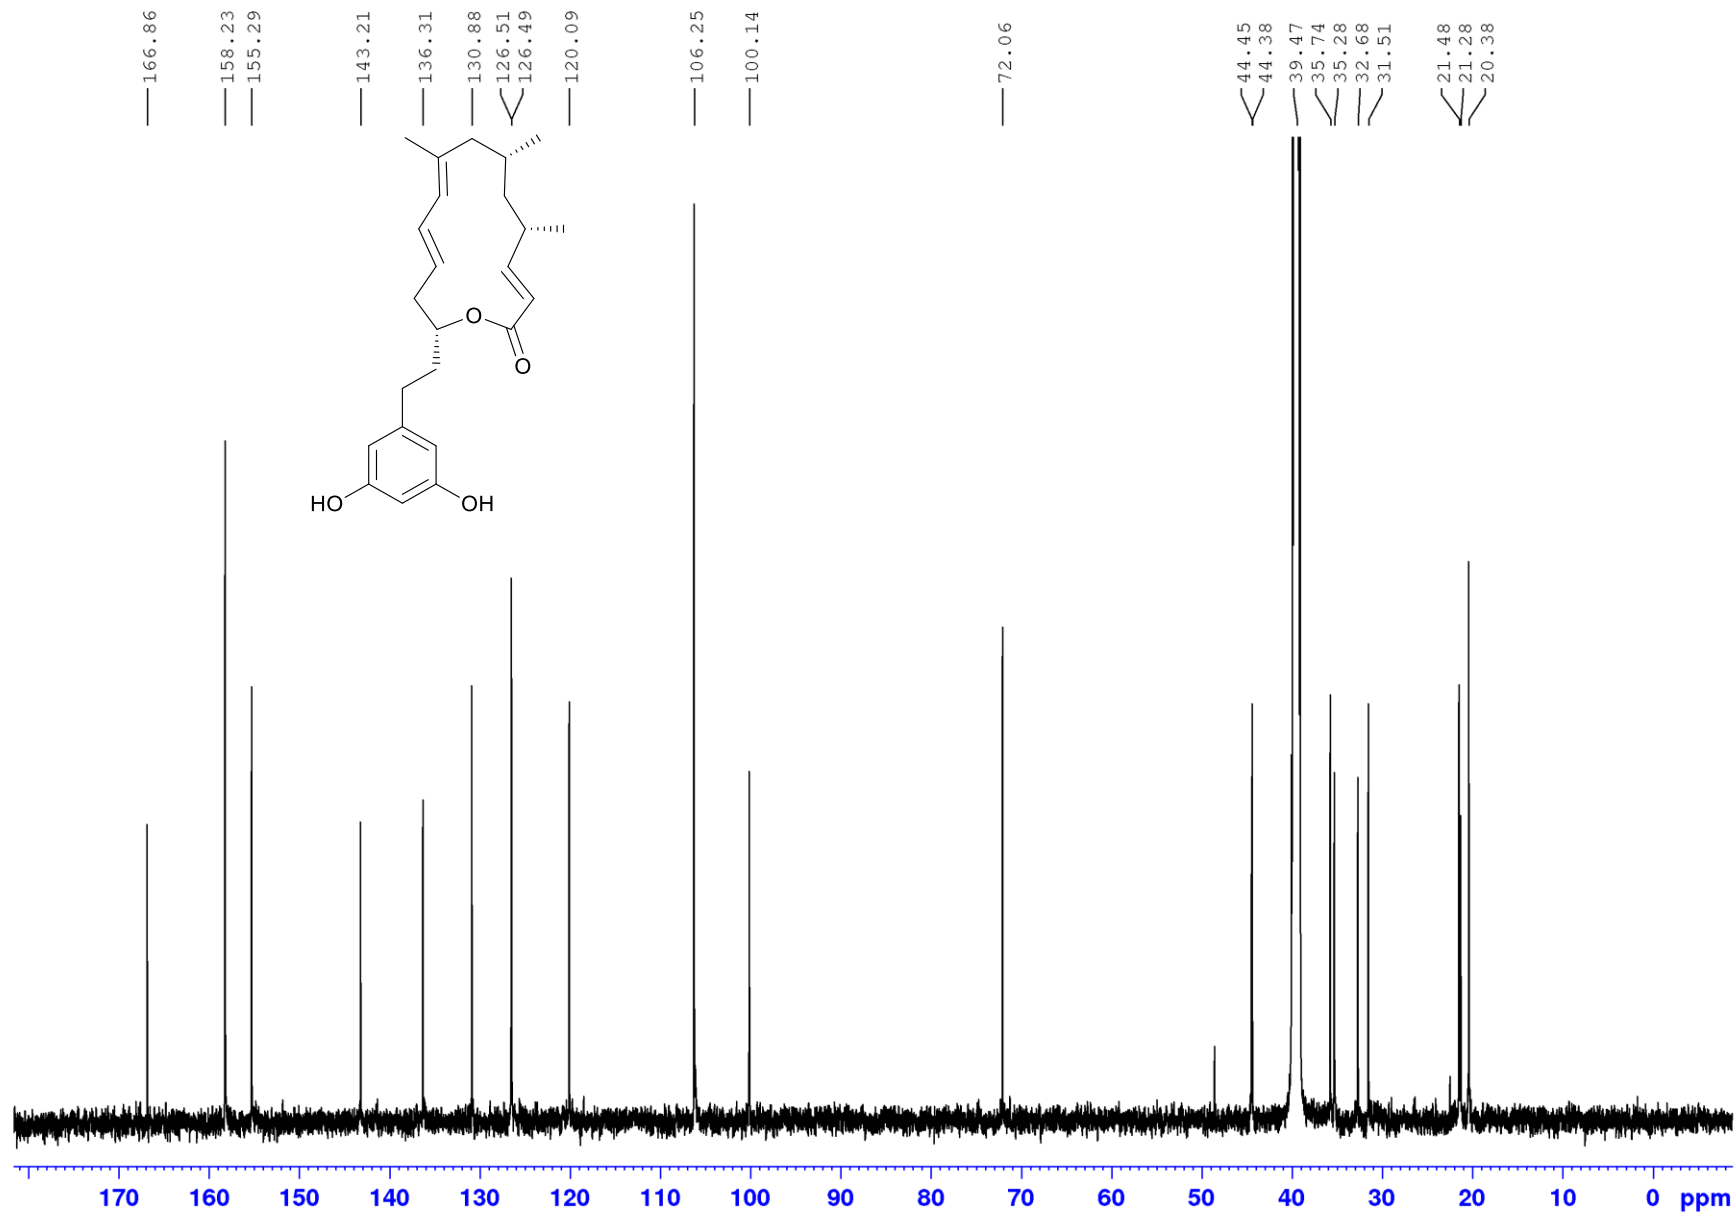

**Figure S12.**  $^1\text{H} - ^{13}\text{C}$  HSQC NMR spectrum (600 MHz,  $\text{DMSO-}d_6$ ) of resorculin B (**2**).

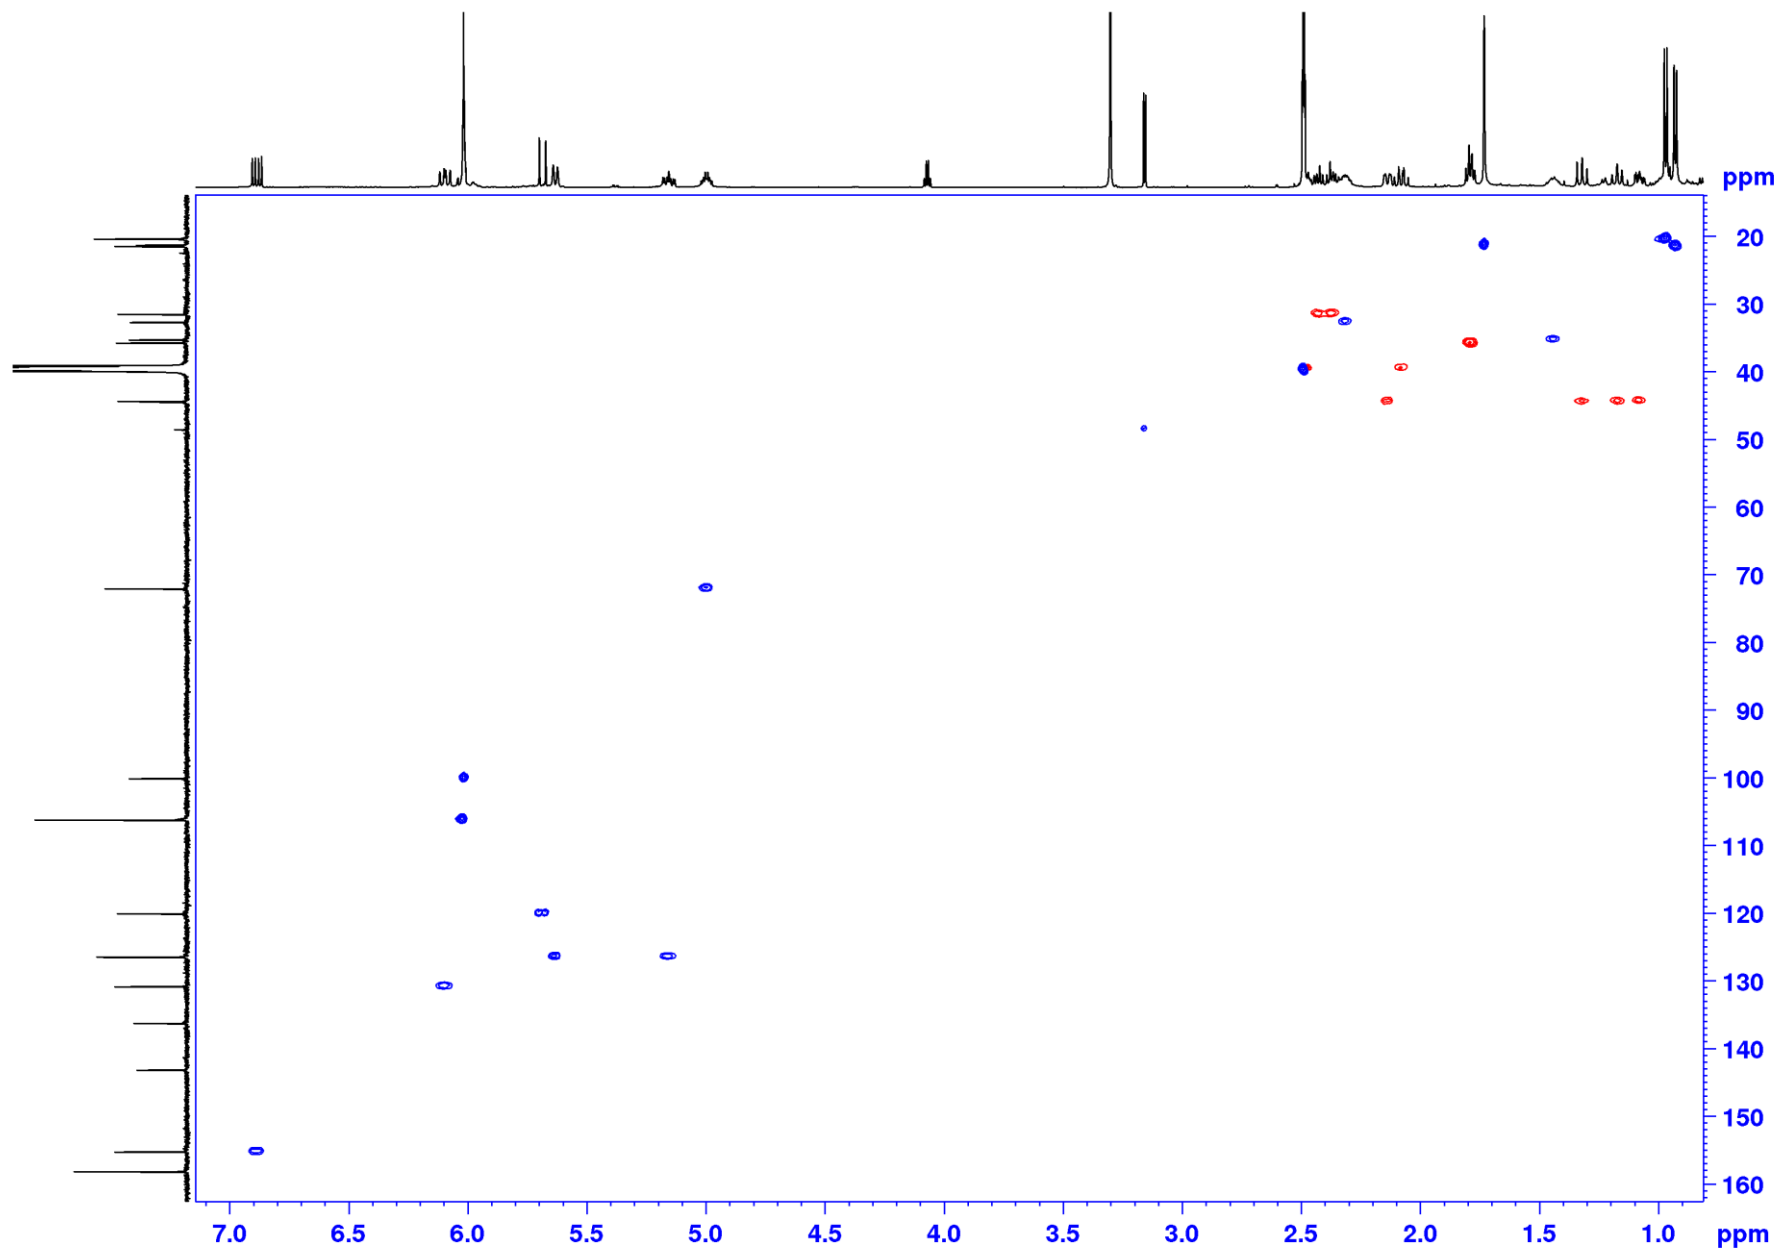

**Figure S13.**  $^1\text{H} - ^1\text{H}$  COSY NMR spectrum (600 MHz,  $\text{DMSO-}d_6$ ) of resorculin B (**2**).

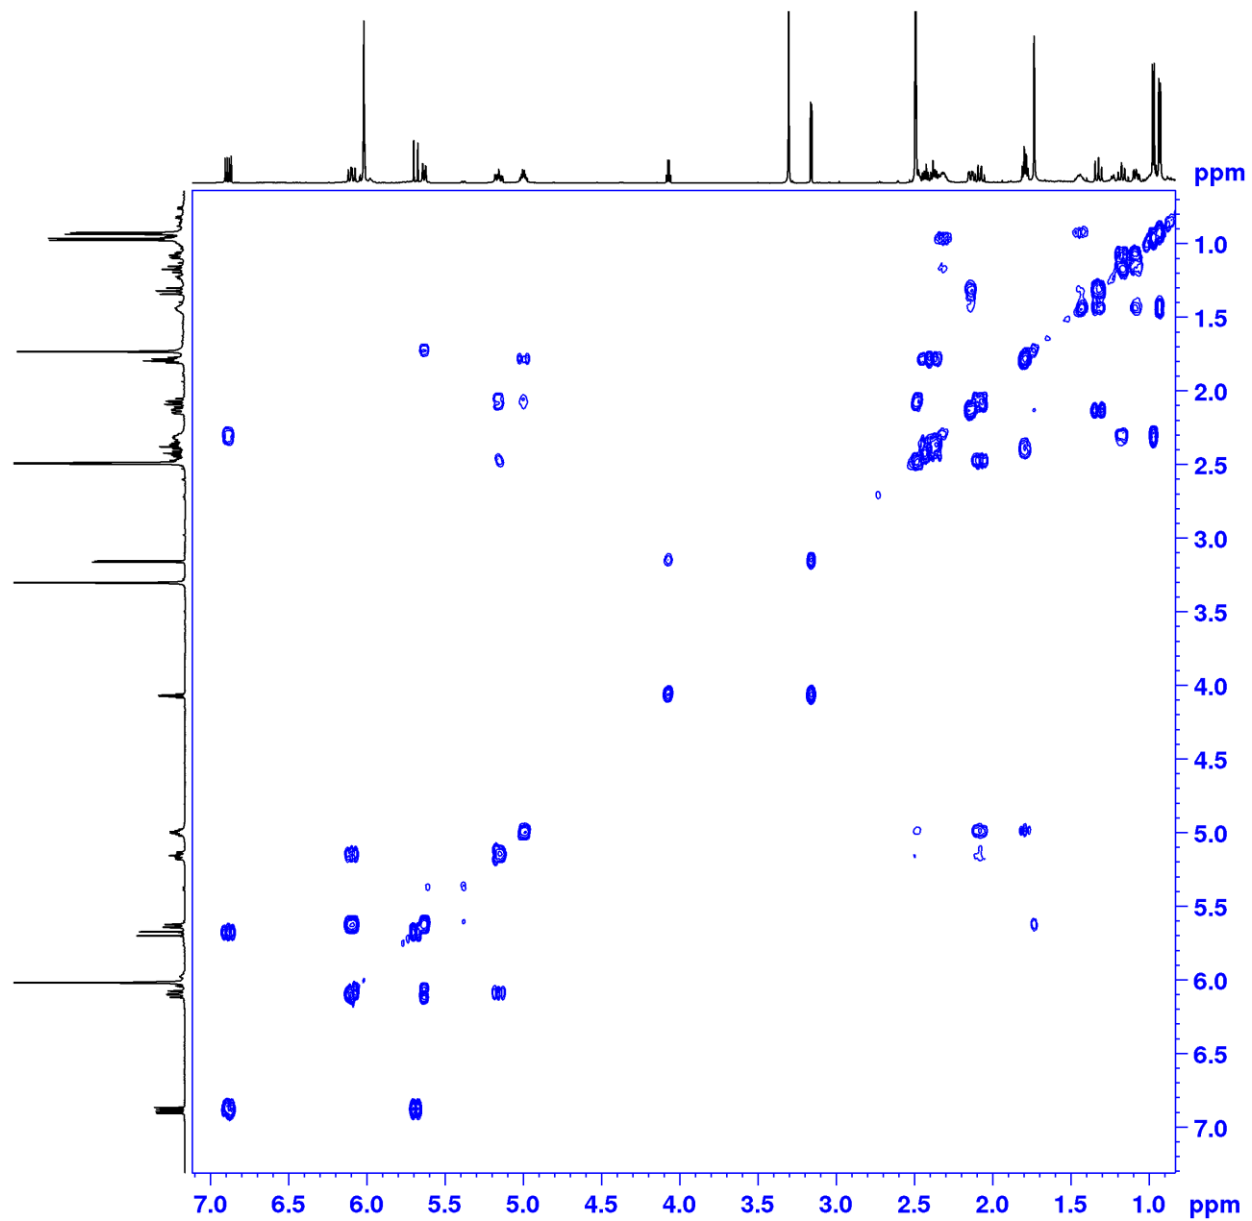



**Figure S14.**  $^1\text{H} - ^{13}\text{C}$  HMBC NMR spectrum (600 MHz,  $\text{DMSO-}d_6$ ) of resorculin B (**2**).

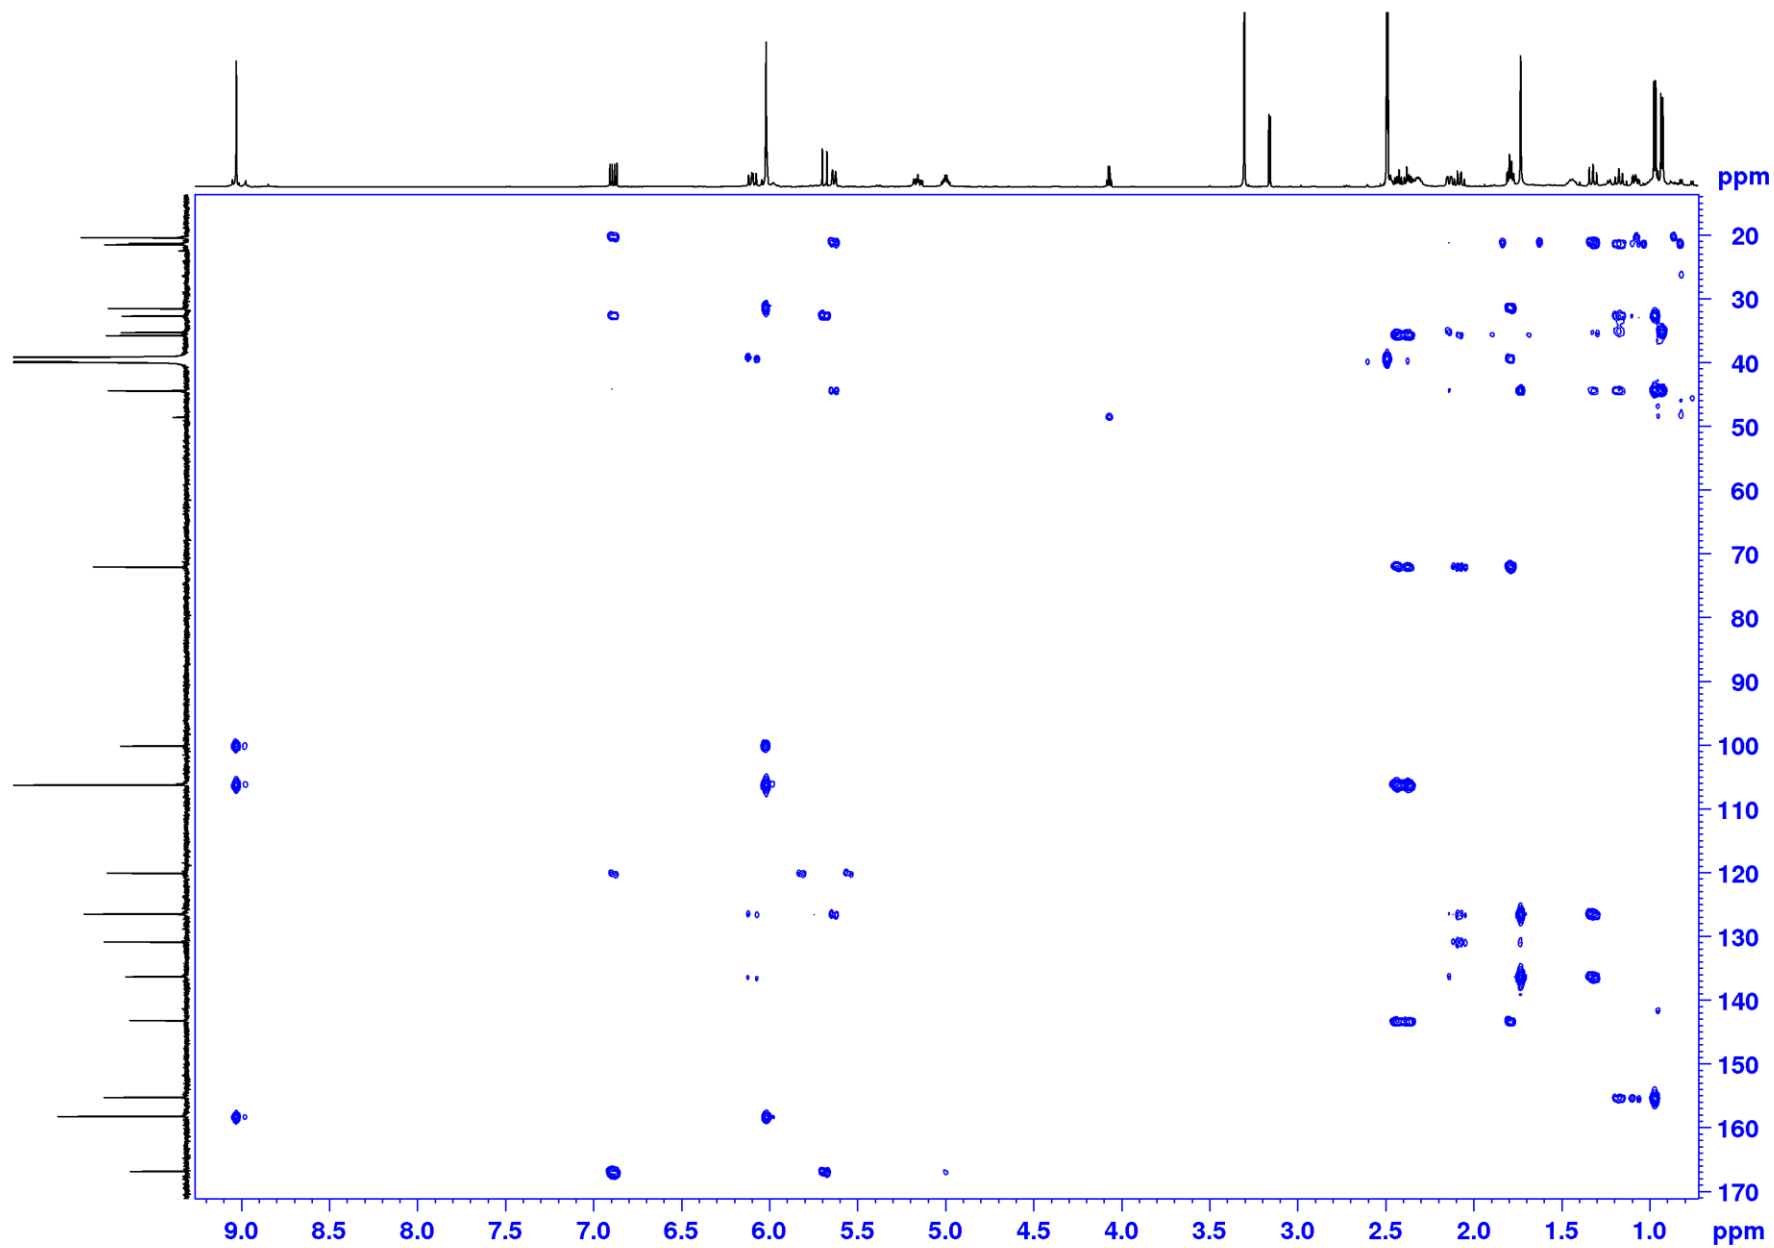

**Figure S15.**  $^1\text{H} - ^1\text{H}$  ROESY NMR spectrum (600 MHz,  $\text{DMSO-}d_6$ ) of resorculin B (2).

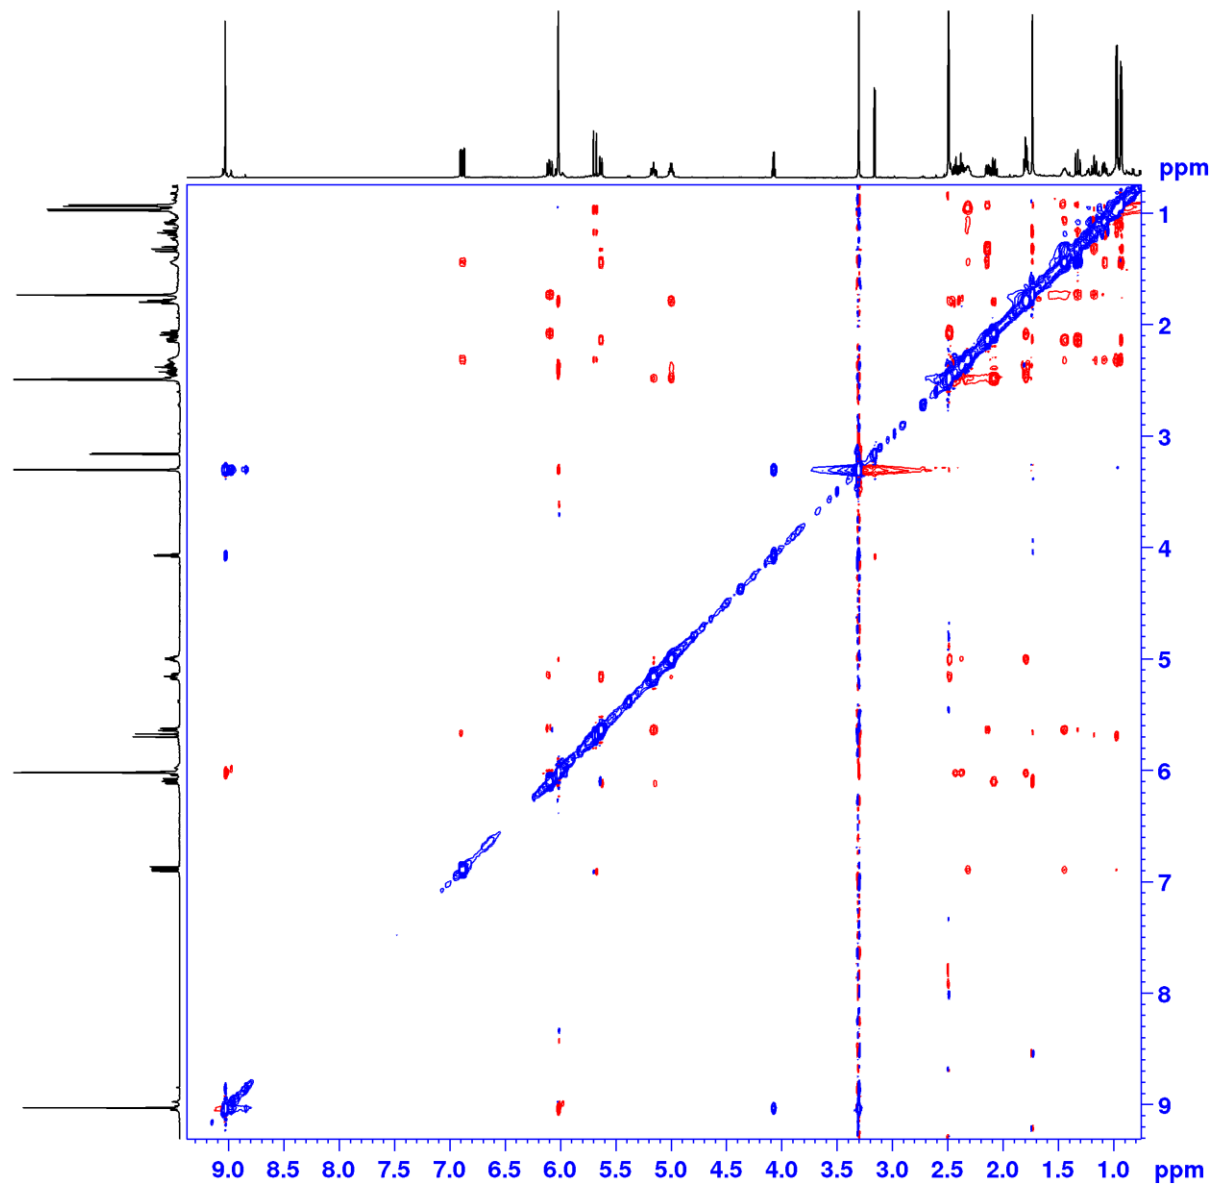

**Figure S16.** IR Spectrum of resorculin A (1).

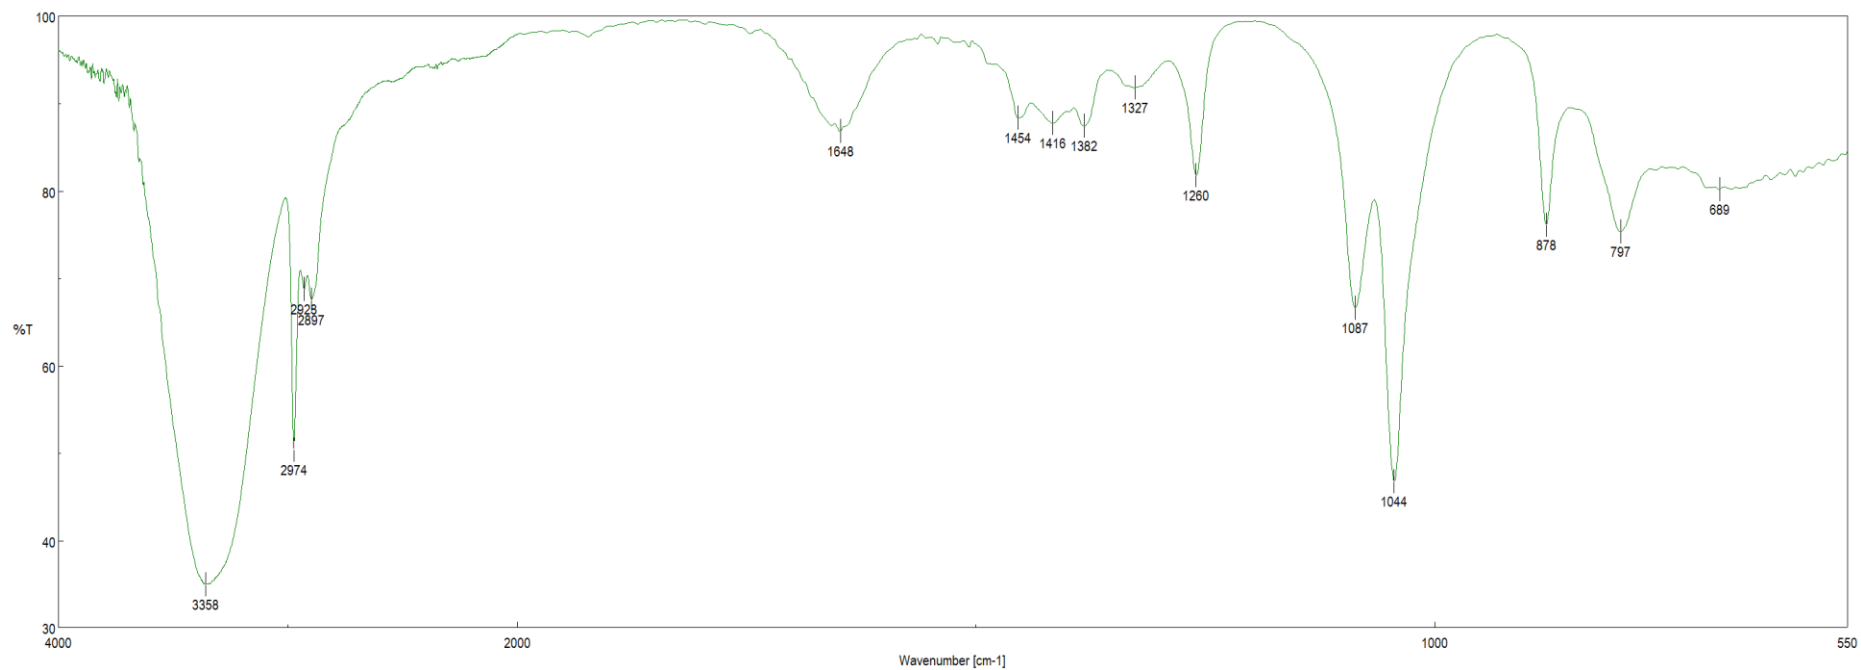

**Figure S17.** IR Spectrum of resorculin B (2).

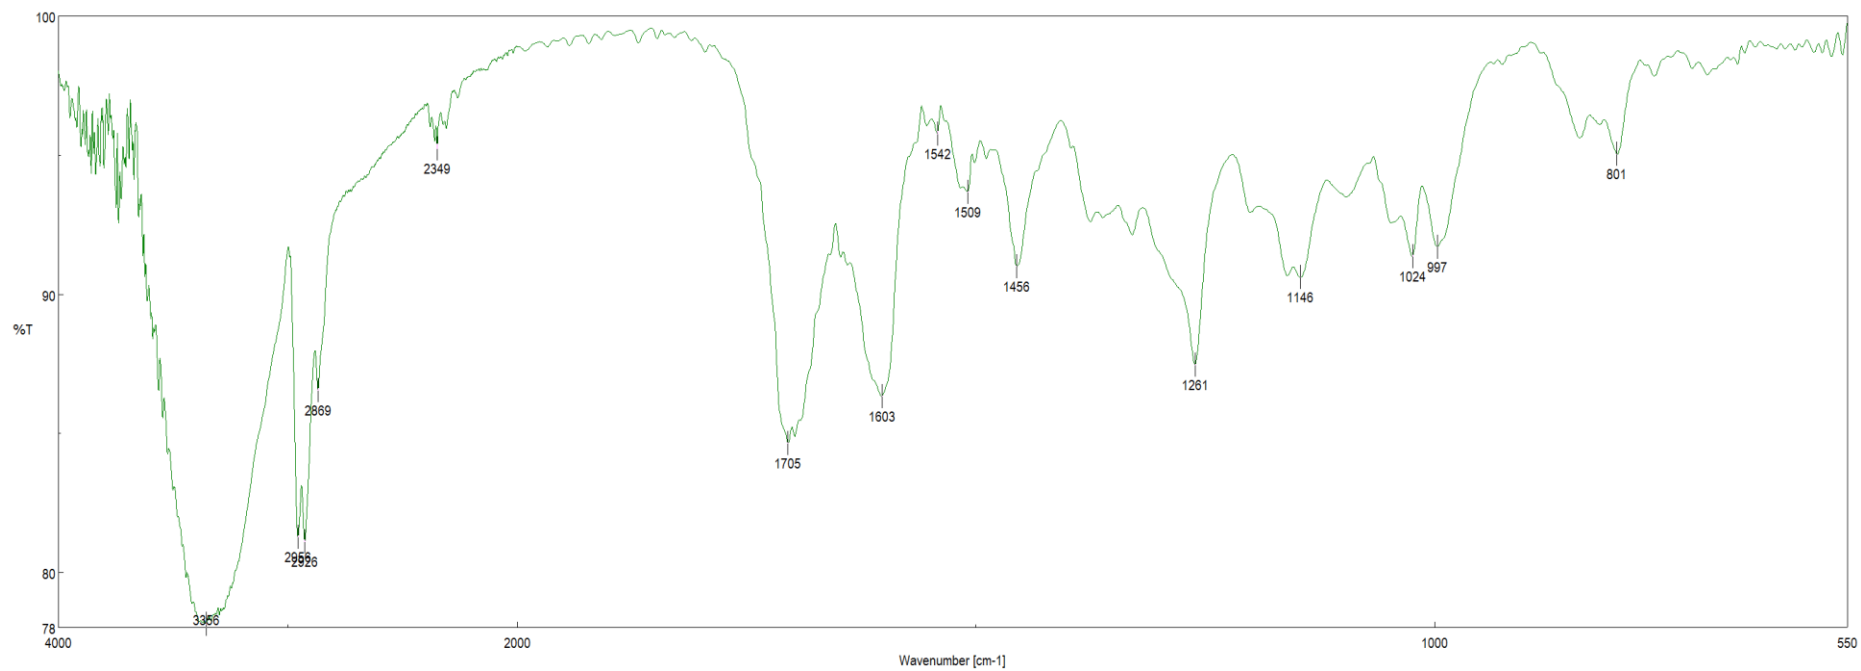

## Supplementary Tables

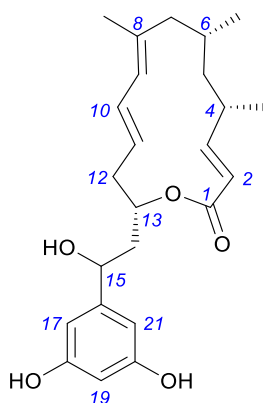

**Table S1.**  $^1\text{H}$  (600 MHz) and  $^{13}\text{C}$  (150 MHz) NMR data for resorculin A (**1**) in  $\text{DMSO-}d_6$ .

| Pos      | $\delta_{\text{C}}$ | $\delta_{\text{H}}$ , mult ( $J$ in Hz)   | HMBC              | COSY           | ROESY               |
|----------|---------------------|-------------------------------------------|-------------------|----------------|---------------------|
| 1        | 166.5               |                                           |                   |                |                     |
| 2        | 120.0               | 5.65, dd (16.0, 0.8)                      | 1, 4              | 3              | 4-Me, 5a            |
| 3        | 155.2               | 6.87, dd (16.0, 7.7)                      | 1, 2, 4, 20       | 2, 4           | 6                   |
| 4        | 32.7                | 2.31, m                                   | 8                 | 3, 4-Me, 5a    | 6, 6-Me             |
| 4-Me     | 20.4                | 0.96, d (6.8)                             | 3, 4, 5           | 4              | 2, 5a/b             |
| 5a       | 44.50 <sup>b</sup>  | 1.17, dd (13.0, 12.1)                     | 3, 6-Me           | 4, 5b          | 2, 4-Me, 7b, 8-Me   |
| 5b       |                     | 1.08, ddd (13.0, 8.7, 2.9)                | 3, 6-Me           | 5a, 6          | 4-Me, 6-Me          |
| 6        | 35.2                | 1.45, m                                   |                   | 5b, 7a/b, 6-Me | 3, 4, 6-Me, 9       |
| 6-Me     | 21.5                | 0.93, d (6.5)                             | 6, 7              | 6              | 4, 5b, 6, 7a        |
| 7a       | 44.45 <sup>b</sup>  | 2.13, m                                   | 8                 | 6, 7b          | 6-Me, 9             |
| 7b       |                     | 1.32, dd (13.1, 12.3)                     |                   | 6, 7a          | 6-Me, 8-Me          |
| 8        | 136.2               |                                           |                   |                |                     |
| 8-Me     | 21.3                | 1.72, s                                   | 7, 8, 9           |                | 5a, 7b, 10          |
| 9        | 126.46 <sup>c</sup> | 5.62, br d (11.1)                         | 6-Me, 7, 8-Me, 11 | 10             | 6, 7a, 11           |
| 10       | 130.9               | 6.08, dd (15.0, 11.1)                     | 8, 9, 11, 12      | 9, 11          | 8-Me, 12b           |
| 11       | 126.52 <sup>c</sup> | 5.14 <sup>d</sup> , ddd (15.0, 10.8, 4.3) | 9                 | 10, 12a/b      | 9, 12a, 13          |
| 12a      | 39.3 <sup>a</sup>   | 2.50 <sup>a</sup>                         | 9, 10, 11         | 11, 12b, 13    | 11, 13, 14b, 15     |
| 12b      |                     | 2.09, ddd (13.2, 10.9, 10.8)              |                   | 11, 12a, 13    | 10, 14a/b, 15       |
| 13       | 70.1                | 5.02, dtd (10.9, 6.5, 4.1)                | 1, 14             | 12a/b, 14a/b   | 11, 12a             |
| 14a      | 44.1                | 1.93, ddd (13.7, 6.8, 6.5)                |                   | 13, 14b, 15    | 12b, 17/21          |
| 14b      |                     | 1.74, ddd (13.7, 6.5, 6.2)                |                   | 13, 14a, 15    | 12a/b, 17/21        |
| 15       | 69.6                | 4.35, ddd (6.8, 6.2, 4.2)                 | 14, 16, 17/21     | 14a/b, 15-OH   | 12a/b, 17/21        |
| 15-OH    |                     | 5.11 <sup>d</sup> , d (4.2)               |                   | 15             | 18/20-OH            |
| 16       | 147.7               |                                           |                   |                |                     |
| 17/21    | 104.0               | 6.17, d (2.2)                             | 15, 18, 19        | 19             | 14a/b, 15, 18/20-OH |
| 18/20    | 158.1               |                                           |                   |                |                     |
| 18/20-OH |                     | 9.06, s                                   |                   |                | 15-OH, 17/21, 19    |
| 19       | 101.1               | 6.05, t (2.2)                             | 17/21, 18         | 17/21          | 18/20-OH            |

<sup>a</sup>Obscured by solvent signal; <sup>b-d</sup>Assignments interchangeable

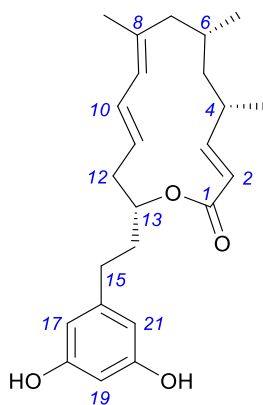

**Table S2.**  $^1\text{H}$  (600 MHz) and  $^{13}\text{C}$  (150 MHz) NMR data for resorculin B (**2**) in  $\text{DMSO-}d_6$ .

| Pos      | $\delta_{\text{C}}$ | $\delta_{\text{H}}$ , mult ( $J$ in Hz) | HMBC              | COSY           | ROESY               |
|----------|---------------------|-----------------------------------------|-------------------|----------------|---------------------|
| 1        | 166.9               |                                         |                   |                |                     |
| 2        | 120.1               | 5.69, dd (16.0, 0.8)                    | 1, 4              | 3              | 4-Me, 5a            |
| 3        | 155.3               | 6.89, dd (16.0, 7.7)                    | 1, 2, 4, 4-Me     | 2, 4           | 6                   |
| 4        | 32.7                | 2.31, m                                 |                   | 3, 4-Me, 5a    | 6, 6-Me             |
| 4-Me     | 20.4                | 0.97, d (6.8)                           | 2, 4, 5           | 4              | 2, 5a/b             |
| 5a       | 44.45 <sup>b</sup>  | 1.17, dd (13.0, 12.1)                   | 3, 4, 6, 6-Me     | 4, 5b          | 2, 4-Me, 7b, 8-Me   |
| 5b       |                     | 1.08, ddd (13.0, 8.8, 2.9)              | 3, 4-Me           | 5a, 6          | 4-Me, 6-Me          |
| 6        | 35.3                | 1.45, m                                 |                   | 5b, 6-Me, 7a/b | 3, 4, 6-Me, 9       |
| 6-Me     | 21.5                | 0.93, d (6.5)                           | 3, 5, 6, 7        | 6              | 4, 5b, 6, 7a        |
| 7a       | 44.38 <sup>b</sup>  | 2.14, dd (13.2, 3.1)                    | 6, 8              | 7b             | 6-Me, 9             |
| 7b       |                     | 1.32, dd (13.2, 12.1)                   | 6-Me, 8, 8-Me, 9  | 7a             | 5a, 6, 8-Me         |
| 8        | 136.3               |                                         |                   |                |                     |
| 8-Me     | 21.3                | 1.73, s                                 | 7, 8, 9           |                | 5a, 7b, 10          |
| 9        | 126.49 <sup>c</sup> | 5.63, d (11.0)                          | 7, 8-Me           | 10             | 6, 7a, 11           |
| 10       | 130.9               | 6.10, dd (15.1, 11.0)                   | 9, 11, 12         | 9, 11          | 8-Me, 12b, 14       |
| 11       | 126.51 <sup>c</sup> | 5.15, ddd (15.1, 10.8, 4.3)             |                   | 10, 12a/b      | 9, 12a, 13          |
| 12a      | 39.5 <sup>a</sup>   | 2.48 <sup>a</sup>                       |                   | 11, 12b, 13    | 11, 13, 14          |
| 12b      |                     | 2.08, ddd (13.2, 10.9, 10.8)            | 10, 11, 13, 14    | 11, 12a, 13    | 10, 14              |
| 13       | 72.1                | 4.99, dtd (10.9, 6.5, 4.1)              |                   | 12a/b, 14      | 11, 12a             |
| 14       | 35.7                | 1.78, ddd (8.0, 7.6, 6.5)               | 12, 13, 15, 16    | 13, 15a/b      | 12a/b, 17/21        |
| 15a      | 31.5                | 2.43, dt (13.7, 7.6)                    | 13, 14, 16, 17/21 | 14             | 17/21               |
| 15b      |                     | 2.38, dt (13.7, 8.0)                    | 13, 14, 16, 17/21 | 14             | 17/21               |
| 16       | 143.2               |                                         |                   |                |                     |
| 17/21    | 106.3               | 6.02 <sup>c</sup>                       | 15, 18/20, 19     |                | 14, 15a/b, 18/20-OH |
| 18/20    | 158.2               |                                         |                   |                |                     |
| 18/20-OH |                     | 9.03, s                                 | 17/21, 18/20, 19  |                | 17/21, 19           |
| 19       | 100.1               | 6.02 <sup>c</sup>                       | 17/21, 18/20      |                | 18/20-OH            |

<sup>a</sup>Obscured by solvent signal; <sup>b-c</sup>Assignments interchangeable

**Table S3.** BLASTP hits for the resorculin (*rsn*) biosynthetic gene cluster.

The putative regulator and genes involved in polyketide and 3,5-dihydroxybenzoic acid (3,5-DHBA) biosynthesis are indicated. Top hits using BLASTP<sup>1</sup> versus the nr database.

| Start | End   | Gene        | Top BLASTP Hit                                                                           | Coverage (%) | Identity (%) | Predicted Role         |
|-------|-------|-------------|------------------------------------------------------------------------------------------|--------------|--------------|------------------------|
| 394   | 1317  | -4          | ABC transporter ATP-binding protein [ <i>Streptomyces albus</i> subsp. <i>albus</i> ]    | 99           | 91           | -                      |
| 1314  | 2918  | -3          | ABC transporter permease [ <i>Streptomyces albus</i> subsp. <i>albus</i> ]               | 99           | 86           | -                      |
| 2994  | 3701  | -2          | LysR family transcriptional regulator [ <i>Streptomyces palmae</i> ]                     | 99           | 96           | -                      |
| 3814  | 4209  | -1          | hypothetical protein ACZ90_64760 [ <i>Streptomyces albus</i> subsp. <i>albus</i> ]       | 95           | 96           | -                      |
| 4497  | 7289  | <i>rsnR</i> | hypothetical protein ACZ90_64770 [ <i>Streptomyces albus</i> subsp. <i>albus</i> ]       | 74           | 91           | Regulator              |
| 7651  | 9111  | <i>rsnI</i> | benzaldehyde dehydrogenase [ <i>Streptomyces albus</i> subsp. <i>albus</i> ]             | 99           | 93           | 3,5-DHBA biosynthesis  |
| 9167  | 10834 | <i>rsnH</i> | thiamine pyrophosphate-binding protein [ <i>Streptomyces albus</i> subsp. <i>albus</i> ] | 98           | 93           | 3,5-DHBA biosynthesis  |
| 10831 | 12189 | <i>rsnG</i> | enoyl-CoA hydratase [ <i>Streptomyces albus</i> subsp. <i>albus</i> ]                    | 95           | 91           | 3,5-DHBA biosynthesis  |
| 12189 | 12992 | <i>rsnF</i> | hypothetical protein ACZ90_64800 [ <i>Streptomyces albus</i> subsp. <i>albus</i> ]       | 86           | 90           | 3,5-DHBA biosynthesis  |
| 12997 | 14082 | <i>rsnE</i> | stilbene synthase [ <i>Streptomyces albus</i> subsp. <i>albus</i> ]                      | 99           | 94           | 3,5-DHBA biosynthesis  |
| 14351 | 28480 | <i>rsnA</i> | type I polyketide synthase [ <i>Streptomyces</i> sp. TSRI0107]                           | 96           | 57           | Macrolide biosynthesis |
| 28507 | 39255 | <i>rsnB</i> | type I polyketide synthase [ <i>Streptomyces hygrosopicus</i> ]                          | 97           | 58           | Macrolide biosynthesis |
| 39255 | 45839 | <i>rsnC</i> | PldA1 [ <i>Streptomyces platensis</i> ]                                                  | 98           | 58           | Macrolide biosynthesis |
| 45889 | 58506 | <i>rsnD</i> | type I polyketide synthase [ <i>Streptomyces caatingaensis</i> ]                         | 92           | 58           | Macrolide biosynthesis |
| 58604 | 59467 | +1          | hypothetical protein [ <i>Streptomyces palmae</i> ]                                      | 95           | 91           | -                      |
| 59924 | 61282 | +2          | M1 family metalloproteinase [ <i>Streptomyces palmae</i> ]                               | 99           | 95           | -                      |
| 61494 | 62369 | +3          | hypothetical protein ACZ90_38515 [ <i>Streptomyces albus</i> subsp. <i>albus</i> ]       | 99           | 83           | -                      |
| 62524 | 64083 | +4          | hypothetical protein ACZ90_38515 [ <i>Streptomyces albus</i> subsp. <i>albus</i> ]       | 99           | 83           | -                      |

**Table S4.** Modules encoded by the resorculin (*rsn*) BGC.

Domains present in each module are shown (coenzyme A ligase (CAL), ketoreductase (KR), acyl carrier protein (ACP), ketosynthase (KS), acyltransferase (AT), dehydratase (DH), enoyl reductase (ER), docking (D) and thioesterase (TE)) along with predicted substrate specificity of AT domains (malonate (mal) or methylmalonate (mmal)) and the KR specificity according to Keatinge-Clay, 2007<sup>2</sup>. Predicted by antiSMASH<sup>3</sup>.

| <b>Protein</b> | <b>Module</b> | <b>Domains</b>             | <b>AT Specificity</b> | <b>KR Specificity</b> |
|----------------|---------------|----------------------------|-----------------------|-----------------------|
| RsnA           | Loading       | CAL, KR, ACP               | mal                   | C1                    |
|                | 1             | KS, AT, DH, ER, KR, ACP    | mal                   | B1                    |
|                | 2             | KS, AT, KR, ACP            | mal                   | B1                    |
| RsnB           | 3             | KS, AT, DH, KR, ACP        | mal                   | B1                    |
|                | 4             | KS, AT, DH, KR, ACP, D     | mmal                  | B1                    |
| RsnC           | 5             | KS, AT, DH, ER, KR, ACP, D | mmal                  | B1                    |
| RsnD           | 6             | KS, AT, DH, ER, KR, ACP    | mmal                  | B1                    |
|                | 7             | KS, AT, DH, KR, ACP, TE    | mal                   | B1                    |



**Table S5.** cblaster analysis of the resorculin (*rsn*) biosynthetic gene cluster.

Rsn proteins are shown in the top row; the number of homologues identified by cblaster<sup>4</sup> (> 30% identity) from each cluster in the MIBiG<sup>5</sup> are shown below and colour coded according to the number of homologues. The top 25 results are shown based on the number of hits.

| MIBiG Accession | Product         | Start  | End    | -4 | -3 | -2 | -1 | R | I | H | G | F | E | A | B | C | D | +1 | +2 | +3 | +4 |
|-----------------|-----------------|--------|--------|----|----|----|----|---|---|---|---|---|---|---|---|---|---|----|----|----|----|
| BGC0001662      | mediomycin A    | 9319   | 165961 | 0  | 0  | 0  | 0  | 2 | 0 | 0 | 0 | 0 | 0 | 3 | 4 | 1 | 2 | 0  | 0  | 0  | 0  |
| BGC0001932      | mediomycin A    | 2426   | 159068 | 0  | 0  | 0  | 0  | 2 | 0 | 0 | 0 | 0 | 0 | 3 | 4 | 1 | 2 | 0  | 0  | 0  | 0  |
| BGC0000052      | ECO-02301       | 61851  | 138007 | 0  | 0  | 0  | 0  | 0 | 0 | 0 | 0 | 0 | 0 | 1 | 4 | 0 | 2 | 0  | 0  | 0  | 0  |
| BGC0001819      | venemycin       | 20093  | 29563  | 0  | 0  | 0  | 0  | 1 | 1 | 1 | 1 | 1 | 1 | 0 | 0 | 0 | 0 | 0  | 0  | 0  | 0  |
| BGC0001066      | kendomycin      | 5120   | 24752  | 0  | 0  | 0  | 0  | 0 | 1 | 1 | 1 | 1 | 1 | 0 | 0 | 0 | 1 | 0  | 0  | 0  | 0  |
| BGC0000290      | A-47934         | 49418  | 53393  | 0  | 0  | 0  | 0  | 0 | 0 | 0 | 2 | 1 | 1 | 0 | 0 | 0 | 0 | 0  | 0  | 0  | 0  |
| BGC0001233      | feglymycin      | 12001  | 15149  | 0  | 0  | 0  | 0  | 0 | 0 | 0 | 1 | 1 | 1 | 0 | 0 | 0 | 0 | 0  | 0  | 0  | 0  |
| BGC0000311      | balhimycin      | 60178  | 63248  | 0  | 0  | 0  | 0  | 0 | 0 | 0 | 1 | 1 | 1 | 0 | 0 | 0 | 0 | 0  | 0  | 0  | 0  |
| BGC0001459      | decaplanin      | 62840  | 65898  | 0  | 0  | 0  | 0  | 0 | 0 | 0 | 1 | 1 | 1 | 0 | 0 | 0 | 0 | 0  | 0  | 0  | 0  |
| BGC0000289      | A40926          | 69670  | 72743  | 0  | 0  | 0  | 0  | 0 | 0 | 0 | 1 | 1 | 1 | 0 | 0 | 0 | 0 | 0  | 0  | 0  | 0  |
| BGC0001460      | decaplanin      | 2063   | 4968   | 0  | 0  | 0  | 0  | 0 | 0 | 0 | 1 | 1 | 1 | 0 | 0 | 0 | 0 | 0  | 0  | 0  | 0  |
| BGC0001462      | avoparcin       | 1986   | 5038   | 0  | 0  | 0  | 0  | 0 | 0 | 0 | 1 | 1 | 1 | 0 | 0 | 0 | 0 | 0  | 0  | 0  | 0  |
| BGC0002034      | perquinoline    | 5782   | 9399   | 0  | 0  | 0  | 0  | 0 | 0 | 0 | 1 | 1 | 1 | 0 | 0 | 0 | 0 | 0  | 0  | 0  | 0  |
| BGC0000419      | ristomycin A    | 2035   | 5003   | 0  | 0  | 0  | 0  | 0 | 0 | 0 | 1 | 1 | 1 | 0 | 0 | 0 | 0 | 0  | 0  | 0  | 0  |
| BGC0000418      | ristocetin      | 66546  | 69517  | 0  | 0  | 0  | 0  | 0 | 0 | 0 | 1 | 1 | 1 | 0 | 0 | 0 | 0 | 0  | 0  | 0  | 0  |
| BGC0001178      | UK-68,597       | 75481  | 78566  | 0  | 0  | 0  | 0  | 0 | 0 | 0 | 1 | 1 | 1 | 0 | 0 | 0 | 0 | 0  | 0  | 0  | 0  |
| BGC0001955      | keratinimicin   | 3434   | 6420   | 0  | 0  | 0  | 0  | 0 | 0 | 0 | 1 | 1 | 1 | 0 | 0 | 0 | 0 | 0  | 0  | 0  | 0  |
| BGC0000455      | vancomycin      | 60010  | 63008  | 0  | 0  | 0  | 0  | 0 | 0 | 0 | 1 | 1 | 1 | 0 | 0 | 0 | 0 | 0  | 0  | 0  | 0  |
| BGC0000440      | teicoplanin     | 73060  | 76142  | 0  | 0  | 0  | 0  | 0 | 0 | 0 | 1 | 1 | 1 | 0 | 0 | 0 | 0 | 0  | 0  | 0  | 0  |
| BGC0000441      | teicoplanin     | 66437  | 69519  | 0  | 0  | 0  | 0  | 0 | 0 | 0 | 1 | 1 | 1 | 0 | 0 | 0 | 0 | 0  | 0  | 0  | 0  |
| BGC0001461      | nogabecin       | 62790  | 65758  | 0  | 0  | 0  | 0  | 0 | 0 | 0 | 1 | 1 | 1 | 0 | 0 | 0 | 0 | 0  | 0  | 0  | 0  |
| BGC0001635      | kistamicin A    | 38928  | 41974  | 0  | 0  | 0  | 0  | 0 | 0 | 0 | 1 | 1 | 1 | 0 | 0 | 0 | 0 | 0  | 0  | 0  | 0  |
| BGC0001148      | pheganomycin    | 11291  | 14547  | 0  | 0  | 0  | 0  | 0 | 0 | 0 | 1 | 1 | 1 | 0 | 0 | 0 | 0 | 0  | 0  | 0  | 0  |
| BGC0001183      | lobophorin A    | 135187 | 138338 | 0  | 0  | 0  | 0  | 0 | 0 | 0 | 1 | 1 | 1 | 0 | 0 | 0 | 0 | 0  | 0  | 0  | 0  |
| BGC0001807      | totopotensamide | 64509  | 67744  | 0  | 0  | 0  | 0  | 0 | 0 | 0 | 1 | 1 | 1 | 0 | 0 | 0 | 0 | 0  | 0  | 0  | 0  |

## References

- 1 S. F. Altschul, W. Gish, W. Miller, E. W. Myers and D. J. Lipman, *J Mol Biol*, 1990, **215**, 403–410.
- 2 A. T. Keatinge-Clay, *Chem Biol*, 2007, **14**, 898–908.
- 3 K. Blin, S. Shaw, K. Steinke, R. Villebro, N. Ziemert, S. Y. Lee, M. H. Medema and T. Weber, *Nucleic Acids Res*, 2019, **47**, W81–W87.
- 4 C. L. M. Gilchrist, T. J. Booth, B. van Wersch, L. van Grieken, M. H. Medema and Y.-H. Chooi, *Bioinform Adv*, 2021, **1**, 1–10.
- 5 M. H. Medema, R. Kottmann, P. Yilmaz, M. Cummings, J. B. Biggins, K. Blin, I. de Bruijn, Y. H. Chooi, J. Claesen, R. C. Coates, P. Cruz-Morales, S. Duddela, S. Düsterhus, D. J. Edwards, D. P. Fewer, N. Garg, C. Geiger, J. P. Gomez-Escribano, A. Greule, M. Hadjithomas, A. S. Haines, E. J. N. Helfrich, M. L. Hillwig, K. Ishida, A. C. Jones, C. S. Jones, K. Jungmann, C. Kegler, H. U. Kim, P. Kötter, D. Krug, J. Masschelein, A. v. Melnik, S. M. Mantovani, E. A. Monroe, M. Moore, N. Moss, H. W. Nützmänn, G. Pan, A. Pati, D. Petras, F. J. Reen, F. Rosconi, Z. Rui, Z. Tian, N. J. Tobias, Y. Tsunematsu, P. Wiemann, E. Wyckoff, X. Yan, G. Yim, F. Yu, Y. Xie, B. Aigle, A. K. Apel, C. J. Balibar, E. P. Balskus, F. Barona-Gómez, A. Bechthold, H. B. Bode, R. Borriss, S. F. Brady, A. A. Brakhage, P. Caffrey, Y. Q. Cheng, J. Clardy, R. J. Cox, R. de Mot, S. Donadio, M. S. Donia, W. A. van der Donk, P. C. Dorrestein, S. Doyle, A. J. M. Driessen, M. Ehling-Schulz, K. D. Entian, M. A. Fischbach, L. Gerwick, W. H. Gerwick, H. Gross, B. Gust, C. Hertweck, M. Höfte, S. E. Jensen, J. Ju, L. Katz, L. Kaysser, J. L. Klassen, N. P. Keller, J. Kormanec, O. P. Kuipers, T. Kuzuyama, N. C. Kyrpides, H. J. Kwon, S. Lautru, R. Lavigne, C. Y. Lee, B. Linqun, X. Liu, W. Liu, A. Luzhetskyy, T. Mahmud, Y. Mast, C. Méndez, M. Metsä-Ketelä, J. Micklefield, D. A. Mitchell, B. S. Moore, L. M. Moreira, R. Müller, B. A. Neilan, M. Nett, J. Nielsen, F. O’Gara, H. Oikawa, A. Osbourn, M. S. Osburne, B. Ostash, S. M. Payne, J. L. Pernodet, M. Petricek, J. Piel, O. Ploux, J. M. Raaijmakers, J. A. Salas, E. K. Schmitt, B. Scott, R. F. Seipke, B. Shen, D. H. Sherman, K. Sivonen, M. J. Smanski, M. Sosio, E. Stegmann, R. D. Süßmuth, K. Tahlan, C. M. Thomas, Y. Tang, A. W. Truman, M. Viaud, J. D. Walton, C. T. Walsh, T. Weber, G. P. van Wezel, B. Wilkinson, J. M. Willey, W. Wohlleben, G. D. Wright, N. Ziemert, C. Zhang, S. B. Zotchev, R. Breitling, E. Takano and F. O. Glöckner, *Nat Chem Biol*, 2015, **11**, 625–631.
